# Supplementary material for: IL‐12 and IL‐15 induce the expression of CXCR6 and CD49a on peripheral natural killer cells
Source: PubMed Central journal article supplement (PMC5818449; doi:10.1002/iid3.190), 2017-09-27
Supplement: IID3-6-34-s002.pdf [file IID3-6-34-s002.pdf]

**Supplementary table 2: Differential expression of genes between CXCR6+ and CXCR6- NK cells**

|          | <b>baseMean</b> | <b>log2FoldChange</b> | <b>lfcSE</b> | <b>stat</b> | <b>pvalue</b> | <b>padj</b> |
|----------|-----------------|-----------------------|--------------|-------------|---------------|-------------|
| CX3CR1   | 1156.401623     | -7.980994386          | 0.52884912   | -15.09125   | 1.85E-51      | 3.65E-47    |
| PPM1L    | 583.6948367     | -4.9054212            | 0.330436319  | -14.845285  | 7.46E-50      | 7.37E-46    |
| MTSS1    | 619.5951011     | -4.72030262           | 0.343356137  | -13.747541  | 5.27E-43      | 3.47E-39    |
| PXN      | 712.4393154     | -5.428799533          | 0.414634737  | -13.092968  | 3.61E-39      | 1.78E-35    |
| LGR6     | 223.6987026     | -6.498281421          | 0.517779783  | -12.55028   | 3.96E-36      | 1.57E-32    |
| S1PR1    | 314.2016863     | -7.031692305          | 0.562416541  | -12.502641  | 7.22E-36      | 2.38E-32    |
| CMKLR1   | 269.2159895     | -6.560409963          | 0.53635757   | -12.231411  | 2.11E-34      | 5.96E-31    |
| GZMB     | 2299.433909     | -4.995093291          | 0.412336243  | -12.114126  | 8.89E-34      | 2.20E-30    |
| PDE3B    | 395.7542464     | -5.658980336          | 0.471765893  | -11.995315  | 3.76E-33      | 8.25E-30    |
| GNLY     | 8886.467113     | -5.650735237          | 0.477491549  | -11.83421   | 2.60E-32      | 5.13E-29    |
| ATP10A   | 366.3147195     | -4.172082588          | 0.355950445  | -11.720965  | 9.95E-32      | 1.79E-28    |
| KIR3DX1  | 232.9493831     | -7.200133678          | 0.618516981  | -11.640964  | 2.55E-31      | 4.20E-28    |
| SYNE1    | 10726.48669     | -3.042275079          | 0.267313602  | -11.380921  | 5.20E-30      | 7.91E-27    |
| AGAP1    | 204.0350272     | -6.961487363          | 0.618091323  | -11.262878  | 2.00E-29      | 2.82E-26    |
| ERBB2    | 447.4176719     | -3.966808571          | 0.355937564  | -11.144675  | 7.60E-29      | 1.00E-25    |
| NHSL2    | 242.1828161     | -6.041681293          | 0.552826104  | -10.928719  | 8.40E-28      | 1.04E-24    |
| AHNAK    | 11834.85436     | -4.050701497          | 0.370917755  | -10.920754  | 9.17E-28      | 1.07E-24    |
| B3GAT1   | 345.6939897     | -8.929690252          | 0.818217463  | -10.91359   | 9.93E-28      | 1.09E-24    |
| FCGR3A   | 1814.013634     | -3.239740659          | 0.302917397  | -10.695129  | 1.07E-26      | 1.12E-23    |
| GZMH     | 642.4817306     | -3.556633866          | 0.345023521  | -10.308381  | 6.46E-25      | 6.38E-22    |
| OSBPL5   | 853.8477407     | -3.206266313          | 0.312178922  | -10.270605  | 9.56E-25      | 8.99E-22    |
| SYNJ2    | 165.4770638     | -4.703168143          | 0.459918597  | -10.226088  | 1.52E-24      | 1.36E-21    |
| ADAMTS17 | 1251.38346      | 3.081798753           | 0.306256673  | 10.0627971  | 8.07E-24      | 6.93E-21    |
| SYT11    | 292.4670117     | -3.327566842          | 0.331388296  | -10.041293  | 1.00E-23      | 8.26E-21    |
| PTPRD    | 222.0815116     | 3.61398661            | 0.360217906  | 10.0327789  | 1.09E-23      | 8.39E-21    |
| GPR141   | 177.2306492     | -7.948604016          | 0.7923382    | -10.031832  | 1.10E-23      | 8.39E-21    |
| FAT4     | 175.0665409     | -3.987543324          | 0.400331591  | -9.9606012  | 2.27E-23      | 1.66E-20    |
| SYNE2    | 9492.098662     | -2.991880991          | 0.305181144  | -9.8036233  | 1.09E-22      | 7.66E-20    |
| P2RY8    | 637.411718      | -3.42167291           | 0.353081197  | -9.6908953  | 3.30E-22      | 2.25E-19    |
| SERPINB9 | 327.4432227     | -5.014313152          | 0.522170858  | -9.6028207  | 7.78E-22      | 5.12E-19    |
| ATXN7L1  | 92.08462477     | -5.369354822          | 0.561719556  | -9.5587821  | 1.19E-21      | 7.59E-19    |
| STK38    | 1125.687869     | -2.837611559          | 0.302417561  | -9.3830912  | 6.41E-21      | 3.96E-18    |
| DTHD1    | 651.9953874     | -4.385634537          | 0.46878052   | -9.3554112  | 8.33E-21      | 4.99E-18    |
| TOX2     | 327.6850266     | 3.772486461           | 0.405134837  | 9.31168123  | 1.26E-20      | 7.31E-18    |
| SLCO4C1  | 254.7138035     | -3.495940576          | 0.383936063  | -9.105528   | 8.58E-20      | 4.85E-17    |
| TTC16    | 105.7462665     | -5.287219155          | 0.594609744  | -8.8919147  | 6.01E-19      | 3.30E-16    |
| FAM65B   | 1643.237615     | -2.669913391          | 0.301552207  | -8.853901   | 8.45E-19      | 4.39E-16    |
| CXCR2    | 128.2030049     | -5.543984957          | 0.626059884  | -8.8553589  | 8.34E-19      | 4.39E-16    |
| CD52     | 121.4370905     | -4.757064861          | 0.539277309  | -8.8211849  | 1.13E-18      | 5.74E-16    |
| SPTBN5   | 88.31704364     | -4.88408546           | 0.554285458  | -8.8114985  | 1.23E-18      | 6.10E-16    |
| UBASH3A  | 124.3906053     | 3.597101877           | 0.409132383  | 8.79202435  | 1.47E-18      | 7.08E-16    |
| XCL1     | 648.8994594     | 3.161995521           | 0.36271465   | 8.71758426  | 2.84E-18      | 1.34E-15    |
| LIF      | 442.9609489     | 3.044709371           | 0.350322484  | 8.69116175  | 3.59E-18      | 1.65E-15    |
| ARVCF    | 161.5725168     | -3.418274792          | 0.393495722  | -8.6869427  | 3.72E-18      | 1.67E-15    |
| GK5      | 1411.683712     | -2.518261852          | 0.291044572  | -8.6524955  | 5.04E-18      | 2.21E-15    |

|          |             |              |             |            |          |          |
|----------|-------------|--------------|-------------|------------|----------|----------|
| SELL     | 357.47285   | -4.711743363 | 0.547520308 | -8.6056048 | 7.59E-18 | 3.23E-15 |
| RASA3    | 1164.700542 | -3.67499634  | 0.42712409  | -8.6040484 | 7.70E-18 | 3.23E-15 |
| SBK1     | 112.283576  | -4.584520356 | 0.533582259 | -8.5919655 | 8.55E-18 | 3.52E-15 |
| KRT72    | 113.0390357 | -6.050882196 | 0.705546871 | -8.5761591 | 9.81E-18 | 3.95E-15 |
| CAPN2    | 794.2785472 | -4.24648981  | 0.495725266 | -8.5662162 | 1.07E-17 | 4.23E-15 |
| CD28     | 138.1372008 | 3.954014291  | 0.464377896 | 8.51464793 | 1.67E-17 | 6.47E-15 |
| FRY      | 190.4141246 | -3.550640856 | 0.418215608 | -8.4899769 | 2.07E-17 | 7.85E-15 |
| KIR2DL1  | 95.46831745 | -5.468412996 | 0.645514924 | -8.4713967 | 2.42E-17 | 9.04E-15 |
| LRRRC8C  | 298.3626647 | -3.363882391 | 0.397606335 | -8.460334  | 2.67E-17 | 9.75E-15 |
| RGS9     | 101.2615334 | -3.683064969 | 0.435567897 | -8.4557769 | 2.77E-17 | 9.96E-15 |
| S100A4   | 470.436332  | -3.31031848  | 0.391993401 | -8.4448322 | 3.04E-17 | 1.07E-14 |
| TNFSF14  | 655.0237568 | 2.296638199  | 0.273025993 | 8.41179324 | 4.04E-17 | 1.40E-14 |
| SPRY1    | 462.1882366 | 2.848233774  | 0.341710765 | 8.33521816 | 7.74E-17 | 2.63E-14 |
| SELPLG   | 928.7254835 | -3.862333691 | 0.464281207 | -8.3189533 | 8.87E-17 | 2.97E-14 |
| VCL      | 684.6127911 | -4.228368059 | 0.512963955 | -8.243012  | 1.68E-16 | 5.53E-14 |
| SPON2    | 2490.869932 | -2.944230026 | 0.358124699 | -8.2212426 | 2.01E-16 | 6.52E-14 |
| LAIR1    | 241.4006477 | -3.526658163 | 0.430533801 | -8.1913619 | 2.58E-16 | 8.23E-14 |
| SSBP3    | 129.2021884 | -3.409264724 | 0.419259298 | -8.1316377 | 4.24E-16 | 1.33E-13 |
| USP6NL   | 151.2400056 | 2.949136365  | 0.365336131 | 8.07239173 | 6.89E-16 | 2.13E-13 |
| CACNA2D2 | 135.6819698 | -3.433228289 | 0.433714928 | -7.9158638 | 2.46E-15 | 7.46E-13 |
| PLXNA4   | 139.5754648 | -4.142954799 | 0.525757062 | -7.8799794 | 3.27E-15 | 9.80E-13 |
| CXCR6    | 1272.207071 | 3.075824148  | 0.390977401 | 7.86701261 | 3.63E-15 | 1.07E-12 |
| GNAL     | 117.0628894 | -3.451750762 | 0.444643924 | -7.762955  | 8.30E-15 | 2.41E-12 |
| NME8     | 108.0401933 | -9.017606704 | 1.166019657 | -7.7336661 | 1.04E-14 | 2.99E-12 |
| MAF      | 388.5160366 | -2.770939132 | 0.359717964 | -7.703088  | 1.33E-14 | 3.75E-12 |
| ADGRG3   | 574.7305747 | 2.803347262  | 0.364596735 | 7.68889844 | 1.48E-14 | 4.13E-12 |
| ENC1     | 728.4432858 | -2.882132099 | 0.376360292 | -7.657907  | 1.89E-14 | 5.19E-12 |
| KRT73    | 65.6178742  | -5.67083512  | 0.740741295 | -7.6556217 | 1.92E-14 | 5.21E-12 |
| TIE1     | 241.4683342 | 2.766636374  | 0.361571339 | 7.65170265 | 1.98E-14 | 5.30E-12 |
| SLC1A7   | 84.05412558 | -7.85941872  | 1.029268059 | -7.6359299 | 2.24E-14 | 5.91E-12 |
| CARMIL3  | 60.80442359 | -4.695704048 | 0.616582446 | -7.6156953 | 2.62E-14 | 6.82E-12 |
| AKR1C3   | 81.67474117 | -9.537318967 | 1.260130512 | -7.5685168 | 3.78E-14 | 9.69E-12 |
| STRBP    | 341.222707  | 2.507185251  | 0.332002019 | 7.55171688 | 4.30E-14 | 1.09E-11 |
| ADGRG1   | 2082.225216 | -2.890494969 | 0.383866063 | -7.529957  | 5.08E-14 | 1.27E-11 |
| MIAT     | 355.2776987 | -3.386234232 | 0.450845577 | -7.5108516 | 5.87E-14 | 1.45E-11 |
| NTNG2    | 167.3435304 | -4.107992635 | 0.54769335  | -7.5005341 | 6.36E-14 | 1.55E-11 |
| BTBD11   | 94.70638788 | -5.643532367 | 0.75327253  | -7.4920193 | 6.78E-14 | 1.61E-11 |
| PCSK5    | 91.86462617 | -4.335409284 | 0.578572627 | -7.4932845 | 6.72E-14 | 1.61E-11 |
| ASCL2    | 57.14082303 | -6.291905193 | 0.842220526 | -7.4706149 | 7.98E-14 | 1.88E-11 |
| XCL2     | 412.1816523 | 2.541884275  | 0.340346068 | 7.4685284  | 8.11E-14 | 1.88E-11 |
| RAP1GAP2 | 887.5840343 | -6.520214652 | 0.873244715 | -7.4666523 | 8.23E-14 | 1.89E-11 |
| CDC25B   | 348.0045848 | -2.773112347 | 0.372629266 | -7.4420144 | 9.92E-14 | 2.25E-11 |
| FGFBP2   | 1248.932267 | -7.374878465 | 0.996253487 | -7.4026124 | 1.34E-13 | 2.98E-11 |
| CEP78    | 2070.437589 | -2.048724434 | 0.276784231 | -7.4018828 | 1.34E-13 | 2.98E-11 |
| DAB2     | 143.6874237 | -4.094604433 | 0.553846558 | -7.3930304 | 1.44E-13 | 3.15E-11 |
| EMP3     | 203.9008485 | -3.007520122 | 0.407158005 | -7.3866167 | 1.51E-13 | 3.27E-11 |
| SOX13    | 59.4063161  | -6.388014959 | 0.865430758 | -7.3813126 | 1.57E-13 | 3.37E-11 |
| MGAT3    | 85.50568662 | 3.8425097    | 0.521398704 | 7.36961882 | 1.71E-13 | 3.64E-11 |

|               |             |              |             |            |          |          |
|---------------|-------------|--------------|-------------|------------|----------|----------|
| GDPD5         | 86.64749275 | -4.822926699 | 0.660423825 | -7.3027752 | 2.82E-13 | 5.92E-11 |
| RP11-20I20.4  | 130.360126  | -3.067726669 | 0.420575471 | -7.2941169 | 3.01E-13 | 6.25E-11 |
| TFEB          | 248.715603  | -3.031958361 | 0.419489392 | -7.2277355 | 4.91E-13 | 1.01E-10 |
| DOK6          | 219.2177995 | -2.948623743 | 0.410303138 | -7.1864518 | 6.65E-13 | 1.35E-10 |
| MGAM          | 199.4812478 | -4.128175317 | 0.579425993 | -7.1245946 | 1.04E-12 | 2.10E-10 |
| RASSF4        | 424.3853219 | -2.448071743 | 0.344010121 | -7.1162783 | 1.11E-12 | 2.21E-10 |
| PTCH1         | 267.656352  | -2.662555046 | 0.374564335 | -7.1084051 | 1.17E-12 | 2.32E-10 |
| LINC00299     | 521.267032  | -2.360514606 | 0.334527443 | -7.056266  | 1.71E-12 | 3.35E-10 |
| DAB2IP        | 288.8293581 | 3.060722491  | 0.434008732 | 7.05221407 | 1.76E-12 | 3.41E-10 |
| CCDC141       | 594.8751439 | 2.326124588  | 0.330482768 | 7.03856543 | 1.94E-12 | 3.73E-10 |
| DRAXIN        | 97.80459698 | -3.952430989 | 0.564149572 | -7.0059984 | 2.45E-12 | 4.66E-10 |
| CLNK          | 190.0303066 | 3.196331054  | 0.457255921 | 6.9902453  | 2.74E-12 | 5.16E-10 |
| SGSM1         | 58.12165111 | -7.376881842 | 1.056627475 | -6.9815351 | 2.92E-12 | 5.44E-10 |
| CAST          | 1024.540607 | -1.905057835 | 0.272972174 | -6.9789452 | 2.97E-12 | 5.44E-10 |
| TMEM173       | 156.6500201 | -3.068316564 | 0.439651383 | -6.9789763 | 2.97E-12 | 5.44E-10 |
| ESR2          | 67.58276179 | -3.59153683  | 0.516636412 | -6.9517687 | 3.61E-12 | 6.54E-10 |
| PAWR          | 110.5030152 | 2.550412399  | 0.368288411 | 6.92504115 | 4.36E-12 | 7.83E-10 |
| LINC00298     | 58.56315198 | -3.775028958 | 0.545794434 | -6.9165765 | 4.63E-12 | 8.24E-10 |
| ITGAX         | 945.0229295 | -2.807436834 | 0.406011286 | -6.9146768 | 4.69E-12 | 8.27E-10 |
| AKT3          | 674.4564308 | -2.128318435 | 0.30861026  | -6.8964604 | 5.33E-12 | 9.32E-10 |
| KIR2DP1       | 72.25052495 | -3.781712294 | 0.548499315 | -6.8946527 | 5.40E-12 | 9.36E-10 |
| SULT1B1       | 87.41070551 | -4.567916383 | 0.664217516 | -6.8771393 | 6.11E-12 | 1.05E-09 |
| KIAA1644      | 41.61193019 | 6.988359679  | 1.016946175 | 6.87190714 | 6.33E-12 | 1.08E-09 |
| GRAP2         | 217.1640349 | -2.402720509 | 0.349822154 | -6.8684058 | 6.49E-12 | 1.10E-09 |
| FAM169A       | 242.5765203 | -2.432157023 | 0.35451948  | -6.8604327 | 6.87E-12 | 1.15E-09 |
| CERCAM        | 47.65040929 | -4.845299781 | 0.707042667 | -6.85291   | 7.24E-12 | 1.19E-09 |
| EPB41L4A      | 68.32544227 | -3.746014436 | 0.546573168 | -6.8536376 | 7.20E-12 | 1.19E-09 |
| SH3BP5        | 112.5262308 | -2.748424493 | 0.401417216 | -6.8468027 | 7.55E-12 | 1.22E-09 |
| KIR3DL1       | 102.9983775 | -4.258940596 | 0.622049274 | -6.846629  | 7.56E-12 | 1.22E-09 |
| CDHR1         | 756.4162987 | 2.710967214  | 0.396540571 | 6.83654439 | 8.11E-12 | 1.30E-09 |
| IL7R          | 166.5106465 | -2.901313282 | 0.425214822 | -6.8231706 | 8.91E-12 | 1.42E-09 |
| CASK          | 382.7730717 | 2.068680053  | 0.304105059 | 6.80251772 | 1.03E-11 | 1.62E-09 |
| FGL2          | 521.482293  | -3.500941388 | 0.517494152 | -6.7651806 | 1.33E-11 | 2.09E-09 |
| GLB1L2        | 42.10631521 | -5.115438305 | 0.756555063 | -6.7614884 | 1.37E-11 | 2.12E-09 |
| PELI2         | 326.6434518 | -2.327144173 | 0.346060302 | -6.7246782 | 1.76E-11 | 2.72E-09 |
| CDC42EP3      | 322.7528628 | -2.458401291 | 0.367415147 | -6.6910722 | 2.22E-11 | 3.39E-09 |
| CHN2          | 587.8037156 | 1.907866016  | 0.285580596 | 6.68065702 | 2.38E-11 | 3.59E-09 |
| TLR3          | 38.97296136 | -5.358326693 | 0.80202662  | -6.6809836 | 2.37E-11 | 3.59E-09 |
| MC1R          | 157.8537218 | -2.954997231 | 0.443154566 | -6.6680961 | 2.59E-11 | 3.88E-09 |
| LAIR2         | 54.33467295 | -7.980992638 | 1.198290627 | -6.6603147 | 2.73E-11 | 4.06E-09 |
| UAP1          | 383.9307801 | -2.167726907 | 0.326390651 | -6.6415104 | 3.10E-11 | 4.58E-09 |
| SPRY2         | 879.3315992 | 2.460579289  | 0.374485667 | 6.57055665 | 5.01E-11 | 7.34E-09 |
| CTD-3076O17.2 | 36.92321016 | 4.361677718  | 0.665117013 | 6.55775996 | 5.46E-11 | 7.93E-09 |
| CCR5          | 238.7523578 | 2.787938815  | 0.426063927 | 6.54347538 | 6.01E-11 | 8.67E-09 |
| RARG          | 56.20378358 | -3.815133377 | 0.584526655 | -6.5268767 | 6.72E-11 | 9.61E-09 |
| LDB2          | 317.5455652 | 2.259897686  | 0.347984148 | 6.49425469 | 8.34E-11 | 1.19E-08 |
| RASGRP2       | 773.7993103 | -2.261435869 | 0.348522568 | -6.4886354 | 8.66E-11 | 1.22E-08 |
| ABCG1         | 183.1367324 | 2.659569081  | 0.412068241 | 6.45419572 | 1.09E-10 | 1.51E-08 |

|                |             |              |             |            |          |          |
|----------------|-------------|--------------|-------------|------------|----------|----------|
| CDHR3          | 37.71736579 | -5.71108133  | 0.884842767 | -6.454346  | 1.09E-10 | 1.51E-08 |
| IL2RB          | 9267.029127 | 1.816137142  | 0.28144692  | 6.45285848 | 1.10E-10 | 1.52E-08 |
| RP11-90E5.1    | 60.22051882 | 3.071810416  | 0.47733002  | 6.43540168 | 1.23E-10 | 1.69E-08 |
| CHD7           | 204.2673563 | -2.371045043 | 0.368723462 | -6.4304154 | 1.27E-10 | 1.73E-08 |
| LINC00565      | 37.24742189 | -8.419881509 | 1.311171559 | -6.4216475 | 1.35E-10 | 1.82E-08 |
| LINC01146      | 62.6445092  | -3.589987221 | 0.559202303 | -6.4198363 | 1.36E-10 | 1.83E-08 |
| C1orf21        | 766.8809444 | -1.823096435 | 0.28490462  | -6.3989711 | 1.56E-10 | 2.09E-08 |
| TIGIT          | 1828.843705 | 1.742666401  | 0.273790729 | 6.36495766 | 1.95E-10 | 2.59E-08 |
| HS6ST1         | 51.82648529 | -3.86356364  | 0.610085524 | -6.332823  | 2.41E-10 | 3.17E-08 |
| AFAP1          | 41.89255963 | -4.989051751 | 0.789987334 | -6.3153566 | 2.70E-10 | 3.53E-08 |
| LYAR           | 154.6089467 | -2.466320504 | 0.390784838 | -6.311198  | 2.77E-10 | 3.60E-08 |
| RP11-93B14.9   | 161.5441624 | 2.11129844   | 0.334654239 | 6.30889496 | 2.81E-10 | 3.63E-08 |
| PRKCA          | 507.3950073 | 1.785750092  | 0.283564732 | 6.2975042  | 3.02E-10 | 3.88E-08 |
| PATJ           | 510.1534777 | 2.147236858  | 0.341289942 | 6.29153279 | 3.14E-10 | 4.01E-08 |
| DZIP3          | 742.7449615 | 2.086837322  | 0.331977153 | 6.28608716 | 3.26E-10 | 4.12E-08 |
| NEO1           | 546.5114324 | 2.376335682  | 0.381053951 | 6.23621846 | 4.48E-10 | 5.64E-08 |
| CALHM2         | 103.0091044 | -2.408658574 | 0.38740468  | -6.2174225 | 5.05E-10 | 6.32E-08 |
| GZMK           | 301.4876087 | 2.658151674  | 0.427610169 | 6.21629668 | 5.09E-10 | 6.32E-08 |
| DENND5A        | 436.6213859 | 2.124661277  | 0.342480636 | 6.20374134 | 5.51E-10 | 6.81E-08 |
| GRAMD3         | 285.7306525 | 2.210979105  | 0.356897183 | 6.19500297 | 5.83E-10 | 7.15E-08 |
| ARL4C          | 2879.026686 | -2.376196203 | 0.383781113 | -6.1915402 | 5.96E-10 | 7.27E-08 |
| FGFR1          | 96.20959158 | -4.313067539 | 0.698101147 | -6.1782846 | 6.48E-10 | 7.85E-08 |
| FGD4           | 144.7834221 | 2.23158189   | 0.361581    | 6.17173439 | 6.75E-10 | 8.14E-08 |
| FAM129A        | 541.055833  | -2.910192828 | 0.471710194 | -6.1694508 | 6.85E-10 | 8.21E-08 |
| ITGB7          | 299.9970558 | -3.223154336 | 0.523745959 | -6.1540414 | 7.55E-10 | 8.99E-08 |
| TGFA           | 359.1117435 | 2.741240703  | 0.445610005 | 6.15165878 | 7.67E-10 | 9.07E-08 |
| ANK3           | 145.6542351 | 2.913841995  | 0.474225931 | 6.14441727 | 8.03E-10 | 9.44E-08 |
| DNMT3A         | 602.4217135 | 1.806838896  | 0.294162744 | 6.14231045 | 8.13E-10 | 9.51E-08 |
| BANK1          | 105.7216557 | 2.955316655  | 0.481338882 | 6.13978377 | 8.26E-10 | 9.60E-08 |
| RP11-229P13.19 | 29.31382496 | -8.07045423  | 1.315620433 | -6.1343333 | 8.55E-10 | 9.88E-08 |
| GREM2          | 52.44479444 | 3.167401218  | 0.516847461 | 6.12830953 | 8.88E-10 | 1.02E-07 |
| DAPK2          | 332.6832632 | 2.499321272  | 0.409061515 | 6.109891   | 9.97E-10 | 1.14E-07 |
| RAP2A          | 378.1209704 | -2.077876519 | 0.340151733 | -6.1086754 | 1.00E-09 | 1.14E-07 |
| DOCK7          | 111.9731097 | 2.190193889  | 0.359702086 | 6.08891073 | 1.14E-09 | 1.28E-07 |
| GAS7           | 450.2668625 | -2.134821482 | 0.351794453 | -6.0683773 | 1.29E-09 | 1.45E-07 |
| RP11-532M24.1  | 31.48156462 | -5.945414729 | 0.98229388  | -6.0525825 | 1.43E-09 | 1.58E-07 |
| PLEKHA1        | 687.0374397 | -1.846111984 | 0.304995023 | -6.0529249 | 1.42E-09 | 1.58E-07 |
| TRPM2          | 360.8450119 | 2.021168613  | 0.334451891 | 6.04322674 | 1.51E-09 | 1.67E-07 |
| SSX2IP         | 177.3505015 | -2.344984621 | 0.392168534 | -5.9795328 | 2.24E-09 | 2.46E-07 |
| GOLM1          | 114.0485134 | -2.358062739 | 0.394487574 | -5.9775336 | 2.27E-09 | 2.47E-07 |
| EEF1DP3        | 24.73508298 | -7.80728745  | 1.313407103 | -5.9443012 | 2.78E-09 | 3.01E-07 |
| LEXM           | 32.58139416 | -6.515659812 | 1.096668918 | -5.9413189 | 2.83E-09 | 3.05E-07 |
| HDAC9          | 759.8569285 | 2.378457376  | 0.400873301 | 5.93318978 | 2.97E-09 | 3.19E-07 |
| CNR2           | 194.1633307 | 2.632617224  | 0.444147931 | 5.92734322 | 3.08E-09 | 3.29E-07 |
| DSTN           | 185.3641599 | -1.996902403 | 0.336969049 | -5.9260707 | 3.10E-09 | 3.30E-07 |
| ME1            | 59.74507027 | 3.89896077   | 0.65908635  | 5.91570554 | 3.30E-09 | 3.49E-07 |
| PRSS35         | 24.30406282 | 5.730341167  | 0.969057155 | 5.91331599 | 3.35E-09 | 3.52E-07 |
| CD226          | 1257.524541 | -2.429735621 | 0.411113945 | -5.910127  | 3.42E-09 | 3.57E-07 |

|               |             |              |             |            |          |          |
|---------------|-------------|--------------|-------------|------------|----------|----------|
| CD27          | 27.94960806 | 4.168973426  | 0.706568845 | 5.90030746 | 3.63E-09 | 3.77E-07 |
| FCGR2C        | 81.48102224 | -3.038274903 | 0.515892503 | -5.8893566 | 3.88E-09 | 4.01E-07 |
| HAVCR1        | 54.12402357 | -2.999630074 | 0.509996068 | -5.8816729 | 4.06E-09 | 4.18E-07 |
| CCND1         | 67.65712172 | 2.733854614  | 0.466037791 | 5.86616508 | 4.46E-09 | 4.57E-07 |
| TSPAN2        | 55.0027525  | -3.909783401 | 0.669296452 | -5.8416317 | 5.17E-09 | 5.26E-07 |
| SPECC1        | 752.008577  | 1.718544432  | 0.294780532 | 5.82991157 | 5.55E-09 | 5.62E-07 |
| TSPAN14       | 739.5390697 | -1.665414052 | 0.287172552 | -5.7993497 | 6.66E-09 | 6.71E-07 |
| SWAP70        | 269.2774713 | 1.909756669  | 0.329456356 | 5.79669093 | 6.76E-09 | 6.75E-07 |
| KLF3          | 772.6481306 | -2.140282965 | 0.369232128 | -5.7965784 | 6.77E-09 | 6.75E-07 |
| SPTB          | 42.57539795 | -4.643089507 | 0.801595532 | -5.7923096 | 6.94E-09 | 6.89E-07 |
| AKR1C7P       | 22.53892477 | -7.685354506 | 1.328907199 | -5.7832138 | 7.33E-09 | 7.24E-07 |
| SIGLEC9       | 45.01581388 | -4.392284665 | 0.760707635 | -5.7739458 | 7.74E-09 | 7.61E-07 |
| ADAMTS1       | 393.4635437 | -2.876506001 | 0.499649725 | -5.7570451 | 8.56E-09 | 8.37E-07 |
| RP11-677N16.1 | 30.67063071 | -4.657946607 | 0.810319734 | -5.7482823 | 9.02E-09 | 8.77E-07 |
| SERPINE2      | 152.9191099 | 2.476049293  | 0.432067781 | 5.73069644 | 1.00E-08 | 9.69E-07 |
| SLC4A4        | 823.6310965 | 1.565454342  | 0.27335909  | 5.72673235 | 1.02E-08 | 9.87E-07 |
| CRTAM         | 280.9953101 | 2.085101337  | 0.364826959 | 5.71531596 | 1.10E-08 | 1.05E-06 |
| PRF1          | 13439.26399 | -1.826871357 | 0.319993127 | -5.7090956 | 1.14E-08 | 1.08E-06 |
| MAML3         | 105.9719721 | 2.228077167  | 0.390416981 | 5.70691665 | 1.15E-08 | 1.09E-06 |
| PTPRB         | 34.24431389 | -5.02404783  | 0.880737527 | -5.7043644 | 1.17E-08 | 1.10E-06 |
| BAALC         | 138.0863142 | 2.377999193  | 0.417311788 | 5.69837532 | 1.21E-08 | 1.14E-06 |
| LINC01451     | 29.10098492 | -7.116815176 | 1.250099015 | -5.6930012 | 1.25E-08 | 1.17E-06 |
| HS3ST3B1      | 261.5682627 | -2.126213759 | 0.373639573 | -5.6905476 | 1.27E-08 | 1.18E-06 |
| KIF13A        | 109.2302908 | -3.507323098 | 0.618442113 | -5.6712229 | 1.42E-08 | 1.32E-06 |
| PRNP          | 274.2441563 | -2.285881802 | 0.403136977 | -5.670236  | 1.43E-08 | 1.32E-06 |
| BPGM          | 304.610208  | -2.222197151 | 0.395075618 | -5.6247388 | 1.86E-08 | 1.71E-06 |
| CD160         | 1745.175112 | 2.041086939  | 0.363090269 | 5.62143113 | 1.89E-08 | 1.73E-06 |
| C19orf84      | 54.8977635  | -2.888977819 | 0.514062904 | -5.6198916 | 1.91E-08 | 1.74E-06 |
| ANXA1         | 1929.302846 | -1.994406918 | 0.35583048  | -5.6049356 | 2.08E-08 | 1.89E-06 |
| CSF2          | 54.12349309 | 2.847859706  | 0.508920159 | 5.59588701 | 2.19E-08 | 1.98E-06 |
| S100B         | 35.00564039 | -5.081477843 | 0.910813156 | -5.5790563 | 2.42E-08 | 2.17E-06 |
| RP4-738P11.4  | 79.39206824 | 2.753105882  | 0.493579088 | 5.57784142 | 2.44E-08 | 2.18E-06 |
| SH2D1A        | 1290.657661 | 1.551326258  | 0.278227666 | 5.57574407 | 2.46E-08 | 2.19E-06 |
| CD55          | 522.4517637 | -2.157736575 | 0.387094094 | -5.5741914 | 2.49E-08 | 2.20E-06 |
| PODN          | 19.11148828 | -7.449316276 | 1.339256753 | -5.5622764 | 2.66E-08 | 2.35E-06 |
| COL13A1       | 27.6821988  | -6.201008923 | 1.115235198 | -5.5602701 | 2.69E-08 | 2.37E-06 |
| MAPK12        | 84.07994316 | 2.614046398  | 0.470577461 | 5.55497578 | 2.78E-08 | 2.43E-06 |
| EBF4          | 30.28460876 | -4.282468263 | 0.772889209 | -5.5408566 | 3.01E-08 | 2.62E-06 |
| TBC1D4        | 90.16487134 | 2.326312761  | 0.422610394 | 5.50462742 | 3.70E-08 | 3.21E-06 |
| KIF19         | 24.39975085 | -5.253225465 | 0.955087085 | -5.5002581 | 3.79E-08 | 3.27E-06 |
| FZD4          | 25.52794176 | -5.025062782 | 0.913937769 | -5.4982549 | 3.84E-08 | 3.29E-06 |
| FLNA          | 12483.05232 | -2.529232017 | 0.460783199 | -5.4889849 | 4.04E-08 | 3.46E-06 |
| MYRF          | 61.04989576 | -2.856263704 | 0.521011086 | -5.4821553 | 4.20E-08 | 3.56E-06 |
| ATP9A         | 193.689666  | -2.410232907 | 0.439603438 | -5.4827435 | 4.19E-08 | 3.56E-06 |
| ZEB1          | 348.6009545 | 1.651613733  | 0.302179436 | 5.46567216 | 4.61E-08 | 3.89E-06 |
| RP11-345J18.2 | 47.78000586 | -3.272034501 | 0.599148125 | -5.4611445 | 4.73E-08 | 3.98E-06 |
| NSG1          | 34.3223889  | -3.439037338 | 0.631562744 | -5.4452821 | 5.17E-08 | 4.33E-06 |
| ANXA4         | 91.45564284 | -2.295180845 | 0.421974236 | -5.4391492 | 5.35E-08 | 4.46E-06 |

|               |             |              |             |            |          |          |
|---------------|-------------|--------------|-------------|------------|----------|----------|
| ACTN1         | 154.8552327 | 2.260761378  | 0.416097293 | 5.43325183 | 5.53E-08 | 4.59E-06 |
| GSTO2         | 85.55961643 | -2.887713877 | 0.531534366 | -5.4327887 | 5.55E-08 | 4.59E-06 |
| RAP2B         | 522.9811921 | -1.658015147 | 0.305441568 | -5.4282564 | 5.69E-08 | 4.68E-06 |
| MBOAT1        | 45.59772752 | 2.892434127  | 0.53298952  | 5.42681238 | 5.74E-08 | 4.70E-06 |
| LZTFL1        | 630.9189426 | 1.855473933  | 0.342442689 | 5.4183488  | 6.02E-08 | 4.91E-06 |
| EVA1C         | 152.118722  | -2.14035831  | 0.395313592 | -5.4143302 | 6.15E-08 | 5.00E-06 |
| PLCH2         | 1313.022124 | 1.787493487  | 0.330877447 | 5.40228264 | 6.58E-08 | 5.33E-06 |
| DHCR24        | 64.59010831 | -3.295918175 | 0.612804328 | -5.3784186 | 7.51E-08 | 6.06E-06 |
| SSBP3-AS1     | 39.66806137 | -3.460393896 | 0.64377005  | -5.3752017 | 7.65E-08 | 6.14E-06 |
| HIP1          | 444.9783493 | 1.570838389  | 0.292444852 | 5.37140038 | 7.81E-08 | 6.25E-06 |
| MMRN1         | 53.25307384 | 2.44186203   | 0.455654604 | 5.35901977 | 8.37E-08 | 6.67E-06 |
| NAAA          | 85.49686777 | -2.381648903 | 0.445271626 | -5.3487551 | 8.86E-08 | 7.03E-06 |
| SPIRE2        | 76.03573078 | -2.907754551 | 0.543716947 | -5.3479197 | 8.90E-08 | 7.03E-06 |
| IL12RB1       | 339.3831198 | -1.839652189 | 0.344160933 | -5.3453254 | 9.03E-08 | 7.10E-06 |
| SMPD3         | 175.7660643 | 2.220436127  | 0.415584417 | 5.34292441 | 9.15E-08 | 7.17E-06 |
| ZNF667        | 31.53357474 | 3.44690458   | 0.646555908 | 5.33117792 | 9.76E-08 | 7.62E-06 |
| SORL1         | 6778.43211  | -1.582838855 | 0.296982203 | -5.3297431 | 9.84E-08 | 7.65E-06 |
| WDR49         | 72.81585568 | 2.174640703  | 0.408109994 | 5.32856518 | 9.90E-08 | 7.66E-06 |
| CEBPB         | 266.791111  | -2.816817987 | 0.528745945 | -5.3273562 | 9.97E-08 | 7.66E-06 |
| RP3-467K16.4  | 168.1591838 | -1.95253358  | 0.366507879 | -5.3273987 | 9.96E-08 | 7.66E-06 |
| ITGA5         | 535.8096002 | -5.414545833 | 1.016970276 | -5.3241928 | 1.01E-07 | 7.76E-06 |
| LTBP3         | 543.1720559 | 1.635634552  | 0.307923066 | 5.31182861 | 1.09E-07 | 8.28E-06 |
| DGKK          | 137.5595736 | -7.518565232 | 1.419164344 | -5.297882  | 1.17E-07 | 8.90E-06 |
| PCDHGB6       | 36.76801209 | -3.145236958 | 0.594945052 | -5.2866008 | 1.25E-07 | 9.43E-06 |
| CHSY3         | 34.41399714 | -4.436703826 | 0.845052638 | -5.25021   | 1.52E-07 | 1.15E-05 |
| AC018634.9    | 15.97972573 | -7.169902879 | 1.365882185 | -5.2492835 | 1.53E-07 | 1.15E-05 |
| FMN1          | 29.41931865 | -6.369930666 | 1.214507924 | -5.2448655 | 1.56E-07 | 1.17E-05 |
| TNFRSF11A     | 24.71403388 | -4.433628453 | 0.846148086 | -5.2397784 | 1.61E-07 | 1.19E-05 |
| RP11-627G23.1 | 20.62682797 | -6.645116887 | 1.268151319 | -5.2400031 | 1.61E-07 | 1.19E-05 |
| PRR5          | 208.2340526 | -1.984358102 | 0.378729013 | -5.2395196 | 1.61E-07 | 1.19E-05 |
| JAKMIP2       | 142.418393  | -2.729149898 | 0.520946858 | -5.2388259 | 1.62E-07 | 1.19E-05 |
| SMPDL3B       | 50.37460547 | 2.515956163  | 0.48172108  | 5.22284838 | 1.76E-07 | 1.29E-05 |
| GRAMD1A       | 373.054433  | 1.713191563  | 0.328227271 | 5.21952839 | 1.79E-07 | 1.31E-05 |
| LIPC          | 28.0394079  | -3.662188993 | 0.702836695 | -5.2105831 | 1.88E-07 | 1.37E-05 |
| ZEB2-AS1      | 179.7735152 | -1.965069693 | 0.3773957   | -5.2069213 | 1.92E-07 | 1.39E-05 |
| TTN           | 7549.353461 | 1.730087162  | 0.332784122 | 5.19882725 | 2.01E-07 | 1.45E-05 |
| PTGDS         | 257.2378447 | -7.279168561 | 1.408577386 | -5.1677449 | 2.37E-07 | 1.71E-05 |
| INPP4B        | 95.9794582  | 2.410786476  | 0.467037665 | 5.16186736 | 2.44E-07 | 1.76E-05 |
| IQSEC1        | 653.6342079 | -1.984401113 | 0.386014414 | -5.1407436 | 2.74E-07 | 1.96E-05 |
| LCNL1         | 17.62384644 | -7.333580711 | 1.430973352 | -5.1248898 | 2.98E-07 | 2.12E-05 |
| LIM2          | 26.79847728 | -3.528027333 | 0.688561167 | -5.1237675 | 2.99E-07 | 2.13E-05 |
| TBX21         | 1297.091247 | -1.576111836 | 0.308082454 | -5.1158767 | 3.12E-07 | 2.21E-05 |
| CABLES1       | 139.4534978 | 2.459081737  | 0.480965984 | 5.11279762 | 3.17E-07 | 2.24E-05 |
| JAG2          | 105.0211904 | 2.278265256  | 0.445687457 | 5.11180025 | 3.19E-07 | 2.24E-05 |
| DAAM1         | 123.226799  | -1.928592109 | 0.377454573 | -5.1094681 | 3.23E-07 | 2.26E-05 |
| GNAQ          | 318.2836176 | 2.113217931  | 0.41403958  | 5.10390318 | 3.33E-07 | 2.32E-05 |
| ADAM22        | 59.00702844 | -2.726204411 | 0.534241763 | -5.1029414 | 3.34E-07 | 2.33E-05 |
| TMCC3         | 286.1676588 | -2.031490704 | 0.398958555 | -5.0919843 | 3.54E-07 | 2.46E-05 |

|               |             |              |             |            |          |          |
|---------------|-------------|--------------|-------------|------------|----------|----------|
| AGPAT4        | 532.7536052 | -2.153361248 | 0.423315816 | -5.0868906 | 3.64E-07 | 2.51E-05 |
| SLAIN1        | 98.09609995 | -2.103063254 | 0.413785897 | -5.0824914 | 3.73E-07 | 2.56E-05 |
| LY9           | 528.8852126 | 1.562914911  | 0.30856877  | 5.06504566 | 4.08E-07 | 2.80E-05 |
| GYG1          | 464.8537673 | 1.388002386  | 0.274665633 | 5.05342577 | 4.34E-07 | 2.97E-05 |
| PCDHGA10      | 29.77524561 | -3.382770331 | 0.670106184 | -5.0481109 | 4.46E-07 | 3.03E-05 |
| ZEB2          | 4071.091806 | -1.731256198 | 0.342961593 | -5.0479594 | 4.47E-07 | 3.03E-05 |
| LRFN2         | 14.62498357 | -7.081295516 | 1.403435769 | -5.0456855 | 4.52E-07 | 3.06E-05 |
| THBS1         | 992.9535466 | 1.76625538   | 0.35047493  | 5.03960548 | 4.66E-07 | 3.15E-05 |
| HIVEP1        | 577.970635  | 1.38724863   | 0.275363254 | 5.03788582 | 4.71E-07 | 3.16E-05 |
| GCSAM         | 104.9614085 | 2.503252475  | 0.497158756 | 5.03511694 | 4.78E-07 | 3.20E-05 |
| PARP15        | 828.8435335 | -1.634332755 | 0.324855475 | -5.0309534 | 4.88E-07 | 3.26E-05 |
| NINL          | 35.36583122 | -3.427807505 | 0.68229066  | -5.0239696 | 5.06E-07 | 3.37E-05 |
| LGALS1        | 169.5568676 | -2.170922993 | 0.433954861 | -5.002647  | 5.65E-07 | 3.75E-05 |
| FZD3          | 25.41024424 | -3.546320788 | 0.708994022 | -5.0019051 | 5.68E-07 | 3.75E-05 |
| LTBP4         | 139.5767772 | -1.981627135 | 0.396519533 | -4.9975524 | 5.81E-07 | 3.81E-05 |
| ABCA1         | 162.0150123 | 2.910766128  | 0.582381603 | 4.99803928 | 5.79E-07 | 3.81E-05 |
| CLIP2         | 242.3889612 | 1.781992049  | 0.357086154 | 4.99037005 | 6.03E-07 | 3.94E-05 |
| C20orf166-AS1 | 28.57282707 | 4.059889488  | 0.814933415 | 4.98186651 | 6.30E-07 | 4.11E-05 |
| HPGD          | 50.76402245 | -3.791262868 | 0.761624993 | -4.9778604 | 6.43E-07 | 4.18E-05 |
| CTD-3088G3.8  | 106.152496  | -2.372990778 | 0.478150997 | -4.9628481 | 6.95E-07 | 4.50E-05 |
| PLOD1         | 229.920771  | -2.4193356   | 0.489135736 | -4.9461436 | 7.57E-07 | 4.89E-05 |
| GBP1          | 154.932807  | -2.155378104 | 0.436424413 | -4.9387203 | 7.86E-07 | 5.06E-05 |
| TSHZ3         | 18.50877775 | -5.291240225 | 1.071653438 | -4.9374546 | 7.91E-07 | 5.08E-05 |
| PWWP2AP1      | 58.90986938 | 2.716985888  | 0.550838057 | 4.93245856 | 8.12E-07 | 5.19E-05 |
| MIR646HG      | 92.7026353  | -2.267264009 | 0.460025021 | -4.9285667 | 8.28E-07 | 5.28E-05 |
| EFHC2         | 29.77512873 | -4.761798813 | 0.966393667 | -4.9273903 | 8.33E-07 | 5.29E-05 |
| RNU2-63P      | 62.88260836 | 2.727486144  | 0.554487357 | 4.91893297 | 8.70E-07 | 5.51E-05 |
| COTL1         | 337.4104072 | 1.744088607  | 0.354600994 | 4.91845381 | 8.72E-07 | 5.51E-05 |
| SORCS2        | 20.17500288 | -4.477251838 | 0.912263259 | -4.9078507 | 9.21E-07 | 5.79E-05 |
| PKD2          | 69.295806   | -2.056306337 | 0.420915702 | -4.8853163 | 1.03E-06 | 6.48E-05 |
| FLNB          | 704.3795578 | 1.909146158  | 0.391351967 | 4.87833541 | 1.07E-06 | 6.69E-05 |
| SCD5          | 47.82628059 | -3.419766627 | 0.702232549 | -4.8698492 | 1.12E-06 | 6.96E-05 |
| S100A6        | 315.014218  | -2.267528186 | 0.465830962 | -4.867706  | 1.13E-06 | 7.01E-05 |
| RAB11FIP1     | 2626.83209  | 1.24278048   | 0.255810997 | 4.85819802 | 1.18E-06 | 7.31E-05 |
| ANTXR2        | 84.35418326 | -3.317021345 | 0.682720252 | -4.8585366 | 1.18E-06 | 7.31E-05 |
| PVT1          | 59.14884952 | 2.272459604  | 0.467815387 | 4.8575991  | 1.19E-06 | 7.31E-05 |
| C11orf21      | 604.91396   | -1.501566062 | 0.309194584 | -4.8563789 | 1.20E-06 | 7.33E-05 |
| WNT10B        | 24.47696021 | -3.422115112 | 0.70488025  | -4.8548886 | 1.20E-06 | 7.37E-05 |
| ADAM15        | 104.3552898 | -2.072500225 | 0.428207794 | -4.8399405 | 1.30E-06 | 7.92E-05 |
| SEL1L3        | 735.8823126 | 1.299444902  | 0.268592052 | 4.83798717 | 1.31E-06 | 7.97E-05 |
| AGPAT4-IT1    | 96.55044471 | -2.661053529 | 0.551640197 | -4.8238934 | 1.41E-06 | 8.53E-05 |
| SIRPG         | 22.25280079 | 3.697102467  | 0.768442779 | 4.8111617  | 1.50E-06 | 9.07E-05 |
| TBXAS1        | 312.6419964 | -1.773372575 | 0.36874476  | -4.8092143 | 1.52E-06 | 9.13E-05 |
| AC006548.28   | 25.73181914 | -4.174059686 | 0.868344413 | -4.8069172 | 1.53E-06 | 9.20E-05 |
| CTD-2017C7.3  | 36.66907242 | -2.946722346 | 0.613496959 | -4.8031572 | 1.56E-06 | 9.35E-05 |
| GUCY1B3       | 32.690303   | -4.337791837 | 0.903729105 | -4.7998806 | 1.59E-06 | 9.48E-05 |
| AKR1C4        | 12.17282806 | -6.787076553 | 1.416601179 | -4.791099  | 1.66E-06 | 9.87E-05 |
| LILRB1        | 111.0864843 | -6.299689433 | 1.317464705 | -4.7816761 | 1.74E-06 | 0.000103 |

|               |             |              |             |            |          |          |
|---------------|-------------|--------------|-------------|------------|----------|----------|
| IFNG-AS1      | 23.30927326 | 3.841551058  | 0.80369633  | 4.77985393 | 1.75E-06 | 0.000104 |
| KRT73-AS1     | 18.0879786  | -6.407167471 | 1.342215447 | -4.773576  | 1.81E-06 | 0.000107 |
| TANC2         | 923.2959619 | 1.335348102  | 0.279846972 | 4.77170824 | 1.83E-06 | 0.000107 |
| TRAT1         | 71.74318951 | 2.25488991   | 0.472672184 | 4.77051535 | 1.84E-06 | 0.000108 |
| UNC5C         | 35.12847961 | 3.420082667  | 0.717126166 | 4.76915058 | 1.85E-06 | 0.000108 |
| SNX18P13      | 24.49332029 | -6.068662476 | 1.273625873 | -4.7648706 | 1.89E-06 | 0.00011  |
| MT2A          | 70.8706418  | -2.458846629 | 0.516138598 | -4.7639271 | 1.90E-06 | 0.00011  |
| ZSWIM5        | 105.4130616 | 1.915998788  | 0.402741038 | 4.75739646 | 1.96E-06 | 0.000114 |
| PLEKHO2       | 780.8724443 | 1.512474126  | 0.318288655 | 4.75189455 | 2.02E-06 | 0.000116 |
| SLC4A10       | 87.754438   | 2.665140911  | 0.561036986 | 4.75038362 | 2.03E-06 | 0.000117 |
| ITGAM         | 1811.114893 | -1.417850667 | 0.298611451 | -4.7481457 | 2.05E-06 | 0.000118 |
| ADARB1        | 379.7158159 | 1.925756967  | 0.405984098 | 4.74342955 | 2.10E-06 | 0.00012  |
| RP11-861A13.3 | 40.15023394 | -2.682857776 | 0.566744562 | -4.7338042 | 2.20E-06 | 0.000126 |
| ATP6V0E2      | 58.61785132 | -2.172733595 | 0.459646107 | -4.7269705 | 2.28E-06 | 0.00013  |
| NUMBL         | 38.81133312 | -2.799939145 | 0.593713064 | -4.7159804 | 2.41E-06 | 0.000137 |
| BCL2          | 867.0430339 | -1.419457847 | 0.301471419 | -4.7084326 | 2.50E-06 | 0.000141 |
| ST6GAL1       | 731.5383117 | -1.545820524 | 0.329150035 | -4.6964009 | 2.65E-06 | 0.000149 |
| RGAG4         | 18.49463503 | -5.474786215 | 1.166157397 | -4.6947232 | 2.67E-06 | 0.00015  |
| CYSLTR2       | 309.4648742 | 1.874254181  | 0.399297728 | 4.6938764  | 2.68E-06 | 0.00015  |
| DKK3          | 103.2352224 | 3.068235914  | 0.654087568 | 4.69086414 | 2.72E-06 | 0.000152 |
| ARAP3         | 42.81796342 | -2.738250028 | 0.584523619 | -4.6845841 | 2.81E-06 | 0.000157 |
| ZNF683        | 11.5395067  | -6.734908842 | 1.438002411 | -4.6835171 | 2.82E-06 | 0.000157 |
| RP1-278C19.8  | 12.36198298 | -6.801527875 | 1.452498341 | -4.6826407 | 2.83E-06 | 0.000157 |
| RNF217        | 79.58804856 | 1.866405447  | 0.398753438 | 4.68060027 | 2.86E-06 | 0.000158 |
| SERPINB8      | 30.32302497 | -2.767186786 | 0.591939389 | -4.6747806 | 2.94E-06 | 0.000162 |
| PLXNC1        | 617.8803589 | 1.524765007  | 0.326487226 | 4.67021336 | 3.01E-06 | 0.000166 |
| IRF8          | 1934.967013 | 1.580790113  | 0.338820283 | 4.66557107 | 3.08E-06 | 0.000169 |
| PDE7A         | 3000.099148 | 1.43982451   | 0.308779569 | 4.66295266 | 3.12E-06 | 0.000171 |
| AC007349.7    | 42.8932479  | 2.707230005  | 0.58065796  | 4.6623489  | 3.13E-06 | 0.000171 |
| C1R           | 34.54181306 | 2.501800658  | 0.536733118 | 4.6611632  | 3.14E-06 | 0.000171 |
| HLA-DPA1      | 278.6750143 | -1.50865007  | 0.323855368 | -4.6584069 | 3.19E-06 | 0.000173 |
| ABCB1         | 1544.714708 | 1.376580356  | 0.295925105 | 4.65178632 | 3.29E-06 | 0.000178 |
| COL5A3        | 24.11864265 | -5.289676351 | 1.137628984 | -4.6497377 | 3.32E-06 | 0.000179 |
| IL23R         | 28.34847307 | 2.824765299  | 0.608462787 | 4.64246189 | 3.44E-06 | 0.000185 |
| TMBIM1        | 463.4522124 | -1.891679196 | 0.40767418  | -4.6401742 | 3.48E-06 | 0.000187 |
| ICAM1         | 504.6884764 | 2.078066491  | 0.44815624  | 4.63692414 | 3.54E-06 | 0.000189 |
| LIMS1         | 359.5918266 | 1.4504785    | 0.313260163 | 4.63026798 | 3.65E-06 | 0.000195 |
| ANXA2         | 250.6111863 | -1.482630124 | 0.320207041 | -4.6302234 | 3.65E-06 | 0.000195 |
| RP11-284N8.3  | 87.61136808 | -2.319101669 | 0.501210301 | -4.6270032 | 3.71E-06 | 0.000197 |
| FRMPD3        | 33.316167   | -3.727914252 | 0.806448572 | -4.6226311 | 3.79E-06 | 0.000201 |
| KIR2DL3       | 49.57478305 | -3.117204874 | 0.675945736 | -4.61162   | 4.00E-06 | 0.00021  |
| F2R           | 775.0938138 | -1.787299921 | 0.387541851 | -4.6118888 | 3.99E-06 | 0.00021  |
| AMPD3         | 122.0242284 | 1.925088463  | 0.4180591   | 4.60482373 | 4.13E-06 | 0.000217 |
| TFDP2         | 893.2574251 | -1.260875755 | 0.273870225 | -4.6039169 | 4.15E-06 | 0.000217 |
| EXPH5         | 214.1393542 | 1.992141981  | 0.43277076  | 4.60322684 | 4.16E-06 | 0.000217 |
| GPR155        | 84.87603781 | -2.362374292 | 0.514962826 | -4.5874657 | 4.49E-06 | 0.000233 |
| AMOT          | 38.16618369 | -2.442298125 | 0.532405251 | -4.5872916 | 4.49E-06 | 0.000233 |
| NIPAL2        | 37.60490377 | -3.407893291 | 0.744572044 | -4.5769826 | 4.72E-06 | 0.000244 |



|               |             |              |             |            |          |          |
|---------------|-------------|--------------|-------------|------------|----------|----------|
| ATP8B4        | 2078.985492 | 1.478114817  | 0.322936014 | 4.57711359 | 4.71E-06 | 0.000244 |
| RP11-445P17.8 | 10.37957682 | -6.574932799 | 1.437166615 | -4.5749273 | 4.76E-06 | 0.000246 |
| KIAA0930      | 442.5157219 | 1.592602037  | 0.348309409 | 4.57237731 | 4.82E-06 | 0.000248 |
| ACP5          | 111.2460054 | 1.839474178  | 0.402360821 | 4.57170301 | 4.84E-06 | 0.000248 |
| PDLIM1        | 103.1858554 | 1.759779634  | 0.385888169 | 4.5603358  | 5.11E-06 | 0.000261 |
| CD3G          | 29.68797691 | -3.184407626 | 0.698697264 | -4.5576357 | 5.17E-06 | 0.000264 |
| MATN2         | 47.30731222 | 2.753115056  | 0.60477443  | 4.5523007  | 5.31E-06 | 0.00027  |
| ITPRIPL1      | 170.8232956 | -1.547673358 | 0.340120358 | -4.5503697 | 5.36E-06 | 0.000272 |
| C12orf75      | 175.1877609 | -1.779763186 | 0.391403286 | -4.547134  | 5.44E-06 | 0.000275 |
| LRRC6         | 22.01704676 | -4.270609785 | 0.940623027 | -4.5401927 | 5.62E-06 | 0.000284 |
| RP11-467I20.6 | 10.93001296 | 7.119113051  | 1.568347101 | 4.53924584 | 5.65E-06 | 0.000285 |
| PDE4D         | 2035.687565 | -2.011894816 | 0.443691003 | -4.5344503 | 5.78E-06 | 0.00029  |
| PLEKHG3       | 1020.064425 | -4.282059511 | 0.945313884 | -4.5297753 | 5.90E-06 | 0.000296 |
| AKR1C8P       | 10.35574725 | -6.565876095 | 1.449749065 | -4.5289742 | 5.93E-06 | 0.000296 |
| MYO6          | 114.8578122 | -2.17991632  | 0.481501733 | -4.5273281 | 5.97E-06 | 0.000298 |
| PALLD         | 107.7297945 | -2.002840285 | 0.442737516 | -4.5237646 | 6.07E-06 | 0.000302 |
| SIGLEC10      | 91.58417773 | -2.005993154 | 0.443589415 | -4.5221844 | 6.12E-06 | 0.000304 |
| ZNF74         | 242.5179368 | 1.419301273  | 0.314340508 | 4.51517141 | 6.33E-06 | 0.000313 |
| LAT2          | 1165.271778 | 1.40836269   | 0.311936497 | 4.51490192 | 6.33E-06 | 0.000313 |
| LINC01505     | 16.84934965 | -4.263020812 | 0.945216309 | -4.5101008 | 6.48E-06 | 0.000319 |
| KLF8          | 23.85552668 | -4.147994241 | 0.920281672 | -4.5073094 | 6.57E-06 | 0.000323 |
| EOMES         | 2163.35995  | 1.401688016  | 0.31111033  | 4.50553889 | 6.62E-06 | 0.000325 |
| ZNF362        | 236.6179603 | 1.427141247  | 0.317440833 | 4.49577087 | 6.93E-06 | 0.000339 |
| HDDC2         | 158.4537129 | -2.064734132 | 0.459465659 | -4.4937725 | 7.00E-06 | 0.000341 |
| BFSP1         | 13.78029981 | -5.957518989 | 1.325924756 | -4.4931049 | 7.02E-06 | 0.000342 |
| RDH10         | 87.04403962 | -2.405870173 | 0.535559471 | -4.4922559 | 7.05E-06 | 0.000342 |
| AF131217.1    | 245.8585621 | 1.413516676  | 0.315344129 | 4.48245757 | 7.38E-06 | 0.000357 |
| PPP2R5A       | 1008.455092 | -1.27937252  | 0.28576967  | -4.476936  | 7.57E-06 | 0.000366 |
| RP11-445P17.3 | 9.868011786 | -6.496157419 | 1.451910813 | -4.4742124 | 7.67E-06 | 0.00037  |
| TIAM1         | 61.56944927 | -2.848208802 | 0.637044819 | -4.4709708 | 7.79E-06 | 0.000373 |
| LAMA2         | 80.02263622 | -2.922134491 | 0.653546168 | -4.4711983 | 7.78E-06 | 0.000373 |
| SFMBT2        | 1815.913353 | 1.214592471  | 0.271906898 | 4.46694246 | 7.93E-06 | 0.00038  |
| UNC93B1       | 128.8975486 | 1.596145562  | 0.357754438 | 4.46156747 | 8.14E-06 | 0.000388 |
| RP11-93B14.10 | 36.18525667 | 2.303842819  | 0.51750842  | 4.45179775 | 8.52E-06 | 0.000405 |
| ANKRD9        | 108.6471708 | -2.44140331  | 0.548662503 | -4.449736  | 8.60E-06 | 0.000408 |
| RUNX2         | 417.9325221 | 2.132630394  | 0.480001575 | 4.44296541 | 8.87E-06 | 0.00042  |
| ZNF229        | 26.37757627 | 3.242090074  | 0.730166223 | 4.44020823 | 8.99E-06 | 0.000425 |
| KIR3DL2       | 68.88684234 | -2.303106376 | 0.519035945 | -4.4372772 | 9.11E-06 | 0.00043  |
| CTD-2532D12.4 | 10.10479562 | -6.54519728  | 1.475250434 | -4.4366686 | 9.14E-06 | 0.00043  |
| RP11-81H14.2  | 167.2730194 | -2.318063184 | 0.522743966 | -4.434414  | 9.23E-06 | 0.000433 |
| FHAD1         | 27.18198368 | -2.974445554 | 0.67187074  | -4.4271098 | 9.55E-06 | 0.000447 |
| FAM167A       | 63.86181141 | 2.721937292  | 0.615404873 | 4.4230025  | 9.73E-06 | 0.000455 |
| TRPV3         | 27.02384534 | -3.204094371 | 0.725710423 | -4.4151142 | 1.01E-05 | 0.00047  |
| NANOGP11      | 9.455855103 | -6.443023076 | 1.460282163 | -4.4121768 | 1.02E-05 | 0.000476 |
| FASLG         | 685.9795706 | 1.288002023  | 0.292109913 | 4.40930611 | 1.04E-05 | 0.000481 |
| MIR600HG      | 112.9220142 | 1.716835637  | 0.389491933 | 4.40788497 | 1.04E-05 | 0.000483 |
| TNR           | 138.9783084 | 2.603347823  | 0.591226144 | 4.40330295 | 1.07E-05 | 0.000492 |
| KLF7          | 169.2487068 | -2.312800422 | 0.525652201 | -4.3998682 | 1.08E-05 | 0.000499 |

|               |             |              |             |            |          |          |
|---------------|-------------|--------------|-------------|------------|----------|----------|
| C2CD2         | 235.2098077 | 1.626141398  | 0.369926432 | 4.39585079 | 1.10E-05 | 0.000507 |
| GLIS3         | 16.93045173 | 4.149400229  | 0.9464183   | 4.38431952 | 1.16E-05 | 0.000533 |
| ZNF667-AS1    | 24.26880799 | 3.071377889  | 0.701007373 | 4.38137744 | 1.18E-05 | 0.000539 |
| ATP1B1        | 80.98261209 | 1.826033102  | 0.417285823 | 4.37597685 | 1.21E-05 | 0.000552 |
| CH17-373J23.1 | 61.27987687 | 3.193672111  | 0.730052534 | 4.37457849 | 1.22E-05 | 0.000554 |
| CDK5R1        | 542.8694066 | 1.65236327   | 0.377786709 | 4.37379938 | 1.22E-05 | 0.000555 |
| CDYL          | 800.2088148 | 1.300839967  | 0.297710473 | 4.36948004 | 1.25E-05 | 0.000564 |
| RPS20P31      | 12.35087581 | -5.828476142 | 1.333965396 | -4.3692859 | 1.25E-05 | 0.000564 |
| ZHX3          | 98.78087341 | -1.81546185  | 0.416017502 | -4.3639074 | 1.28E-05 | 0.000576 |
| PATL2         | 498.7663474 | -1.7095743   | 0.392165788 | -4.3593152 | 1.30E-05 | 0.000587 |
| RP11-23P13.6  | 19.82513079 | -3.667644254 | 0.84316028  | -4.3498779 | 1.36E-05 | 0.000612 |
| CXorf40A      | 318.4527688 | 1.564026106  | 0.360201114 | 4.34209125 | 1.41E-05 | 0.000632 |
| SATB2         | 12.52384386 | -5.942039934 | 1.371583341 | -4.3322485 | 1.48E-05 | 0.00066  |
| PRSS30P       | 72.00890864 | -2.287026043 | 0.52798791  | -4.3315879 | 1.48E-05 | 0.00066  |
| LINC00484     | 62.73452305 | -2.533300719 | 0.584924674 | -4.3309862 | 1.48E-05 | 0.000661 |
| LINC00963     | 80.11884588 | -1.983015317 | 0.458284904 | -4.3270361 | 1.51E-05 | 0.000668 |
| FOSB          | 8842.34726  | 1.209890337  | 0.279674945 | 4.32605908 | 1.52E-05 | 0.000668 |
| ADAM28        | 327.1411681 | 1.478044642  | 0.341554498 | 4.327405   | 1.51E-05 | 0.000668 |
| RGS1          | 3275.607839 | 1.470230612  | 0.339791673 | 4.32685886 | 1.51E-05 | 0.000668 |
| OR7E13P       | 9.027775351 | -6.375069231 | 1.473526986 | -4.3264014 | 1.52E-05 | 0.000668 |
| HLA-DPB1      | 212.2175029 | -1.998019674 | 0.46236474  | -4.3213063 | 1.55E-05 | 0.000681 |
| CTD-2020K17.1 | 264.585717  | 1.425900741  | 0.330080619 | 4.319856   | 1.56E-05 | 0.000684 |
| LINC00092     | 22.37145372 | -3.165577245 | 0.73355499  | -4.3153919 | 1.59E-05 | 0.000696 |
| RNVU1-19      | 91.68292277 | 2.630430465  | 0.609685129 | 4.31440811 | 1.60E-05 | 0.000698 |
| ZNF600        | 284.0729572 | -1.44739615  | 0.336205665 | -4.3050915 | 1.67E-05 | 0.000726 |
| RP11-4B16.3   | 35.12523268 | -2.7265624   | 0.63340525  | -4.3046097 | 1.67E-05 | 0.000726 |
| ARHGEF11      | 50.26554864 | 2.305335121  | 0.535935141 | 4.30151887 | 1.70E-05 | 0.000735 |
| GOLGA7B       | 16.28004853 | -4.296709466 | 1.002013611 | -4.288075  | 1.80E-05 | 0.000779 |
| STK17A        | 2220.252589 | 1.111276756  | 0.259256715 | 4.28639526 | 1.82E-05 | 0.000783 |
| STARD9        | 1381.601549 | 1.257029975  | 0.2941782   | 4.27302218 | 1.93E-05 | 0.00083  |
| SPIRE1        | 36.86738986 | -2.366733887 | 0.55400368  | -4.2720545 | 1.94E-05 | 0.000832 |
| RP11-730K11.1 | 44.51684045 | -2.292162657 | 0.536905047 | -4.2692142 | 1.96E-05 | 0.000841 |
| BACH2         | 124.3972019 | -2.26743246  | 0.531713729 | -4.2643858 | 2.00E-05 | 0.000857 |
| CARMIL2       | 264.4363984 | 1.448756269  | 0.340084845 | 4.25998479 | 2.04E-05 | 0.000872 |
| STAMBPL1      | 326.7858405 | 1.314946571  | 0.309054019 | 4.25474671 | 2.09E-05 | 0.000891 |
| RP3-471M13.2  | 20.54576697 | 4.102091953  | 0.964235554 | 4.25424258 | 2.10E-05 | 0.000891 |
| FAM110C       | 14.76145367 | -4.812768268 | 1.133777328 | -4.2448973 | 2.19E-05 | 0.000927 |
| NEK3          | 24.89776855 | -3.042745481 | 0.717374612 | -4.2415015 | 2.22E-05 | 0.000939 |
| RP11-753H16.5 | 8.842053049 | -6.359414762 | 1.502480002 | -4.2326119 | 2.31E-05 | 0.000975 |
| AC125421.1    | 8.836095658 | -6.357033648 | 1.502861407 | -4.2299534 | 2.34E-05 | 0.000985 |
| GAS1          | 18.35182187 | -3.338307768 | 0.789568036 | -4.2280179 | 2.36E-05 | 0.000991 |
| IGF2R         | 3822.489397 | -1.307396574 | 0.309494339 | -4.2242988 | 2.40E-05 | 0.001005 |
| CA5B          | 252.587242  | -1.29161259  | 0.306216731 | -4.2179687 | 2.47E-05 | 0.001031 |
| KCNQ5         | 197.8572306 | 1.408049292  | 0.333850664 | 4.21760219 | 2.47E-05 | 0.001031 |
| C17orf51      | 12.91700359 | -5.085276235 | 1.20701887  | -4.2130876 | 2.52E-05 | 0.00105  |
| AATK          | 220.443926  | 1.572211323  | 0.373309101 | 4.21155369 | 2.54E-05 | 0.001055 |
| CRACR2B       | 36.3687875  | 2.256889787  | 0.536536288 | 4.20640661 | 2.59E-05 | 0.001077 |
| ADAMTS14      | 27.70545909 | -3.437971257 | 0.818012761 | -4.2028333 | 2.64E-05 | 0.001092 |

|            |             |              |             |            |          |          |
|------------|-------------|--------------|-------------|------------|----------|----------|
| ARHGAP42   | 48.48524445 | -2.314001391 | 0.550942311 | -4.2000793 | 2.67E-05 | 0.001103 |
| GPR82      | 101.9675273 | 2.083420227  | 0.49623937  | 4.19841785 | 2.69E-05 | 0.001109 |
| RASSF3     | 349.4592184 | -1.22217939  | 0.29125024  | -4.1963206 | 2.71E-05 | 0.001114 |
| SIGLEC17P  | 207.1442542 | 1.573605831  | 0.374965975 | 4.196663   | 2.71E-05 | 0.001114 |
| LTA        | 23.34819955 | 3.561644178  | 0.848887674 | 4.19566014 | 2.72E-05 | 0.001115 |
| MX2        | 131.2776059 | -1.620427447 | 0.386674921 | -4.1906712 | 2.78E-05 | 0.001138 |
| ZDBF2      | 220.4842759 | 1.749288815  | 0.417693914 | 4.18796817 | 2.81E-05 | 0.001149 |
| RAB11FIP5  | 72.36389504 | -2.663069692 | 0.636255703 | -4.1855337 | 2.84E-05 | 0.001159 |
| PPP2R5C    | 3524.479885 | -1.211026028 | 0.289770876 | -4.1792538 | 2.92E-05 | 0.001189 |
| ZMAT4      | 12.77235446 | -5.91999979  | 1.417959956 | -4.175012  | 2.98E-05 | 0.001209 |
| BCO2       | 203.326195  | 2.077606356  | 0.498347249 | 4.16899333 | 3.06E-05 | 0.001239 |
| CCRL2      | 58.27406769 | 2.065352387  | 0.495985526 | 4.16413843 | 3.13E-05 | 0.001263 |
| STX11      | 243.980111  | 1.43737758   | 0.345579678 | 4.15932322 | 3.19E-05 | 0.001287 |
| ZYG11B     | 128.8206961 | -1.556768477 | 0.374334193 | -4.1587664 | 3.20E-05 | 0.001287 |
| CCNB3      | 16.04212477 | -4.435123802 | 1.066975012 | -4.156727  | 3.23E-05 | 0.001296 |
| SVIL       | 116.5889823 | -2.220386938 | 0.534414622 | -4.154802  | 3.26E-05 | 0.001305 |
| LINC01504  | 18.67656839 | -4.159376689 | 1.001321975 | -4.1538854 | 3.27E-05 | 0.001307 |
| ARMCX2     | 38.30196903 | 2.247971547  | 0.541381398 | 4.15228812 | 3.29E-05 | 0.001314 |
| LINC00996  | 103.2511827 | 1.698511335  | 0.409501087 | 4.14775781 | 3.36E-05 | 0.001337 |
| SLC2A1     | 331.9063987 | -1.489350739 | 0.359834192 | -4.1389917 | 3.49E-05 | 0.001387 |
| NUDT14     | 72.5924146  | 2.008785494  | 0.485817355 | 4.13485742 | 3.55E-05 | 0.001409 |
| AIG1       | 63.94207301 | 1.791091061  | 0.433637286 | 4.13038989 | 3.62E-05 | 0.001431 |
| ENO2       | 26.16185771 | -2.897058119 | 0.701373376 | -4.1305505 | 3.62E-05 | 0.001431 |
| PRSS23     | 493.1202428 | -5.139354163 | 1.244680751 | -4.1290541 | 3.64E-05 | 0.001436 |
| PDE9A      | 15.21774153 | 3.355763961  | 0.813636623 | 4.12440132 | 3.72E-05 | 0.001463 |
| ANO9       | 130.5649927 | 1.810587534  | 0.439329923 | 4.12124793 | 3.77E-05 | 0.00148  |
| RELL1      | 226.6832299 | 1.417498122  | 0.344391216 | 4.11595318 | 3.86E-05 | 0.001511 |
| KIR2DS4    | 91.9790384  | -4.998573862 | 1.215141108 | -4.1135748 | 3.90E-05 | 0.001524 |
| AC021188.4 | 27.1728243  | -2.543034179 | 0.618415889 | -4.1121747 | 3.92E-05 | 0.001528 |
| MDFIC      | 498.7926078 | 1.336630947  | 0.325051151 | 4.11206342 | 3.92E-05 | 0.001528 |
| CLDND1     | 862.3970219 | 1.367084039  | 0.332760753 | 4.10830912 | 3.99E-05 | 0.00155  |
| MGAT4A     | 2182.002369 | -1.295428434 | 0.315710507 | -4.1032161 | 4.07E-05 | 0.001581 |
| PCDH1      | 87.27708207 | -5.538864962 | 1.350634443 | -4.1009357 | 4.11E-05 | 0.001594 |
| MSX2P1     | 12.07354186 | -5.078119283 | 1.239820549 | -4.0958502 | 4.21E-05 | 0.001626 |
| MACC1      | 23.06515008 | 2.639861031  | 0.645132251 | 4.09196878 | 4.28E-05 | 0.00165  |
| KCNA3      | 206.3412346 | -1.804104564 | 0.441209313 | -4.0889993 | 4.33E-05 | 0.001668 |
| AMOTL1     | 61.09054111 | -2.310137186 | 0.566188989 | -4.0801521 | 4.50E-05 | 0.00173  |
| CELSR2     | 58.08795737 | -2.339891073 | 0.574790392 | -4.0708598 | 4.68E-05 | 0.001794 |
| KLF2       | 1129.446113 | -1.615895519 | 0.396944316 | -4.0708368 | 4.68E-05 | 0.001794 |
| ARHGAP8    | 12.47137101 | -5.091748658 | 1.253013183 | -4.0636034 | 4.83E-05 | 0.001843 |
| AHR        | 386.8588191 | 1.619661018  | 0.398556421 | 4.06381865 | 4.83E-05 | 0.001843 |
| TXNIP      | 13492.16443 | -1.814227654 | 0.446520105 | -4.0630369 | 4.84E-05 | 0.001844 |
| KSR1       | 571.2718587 | 1.532842178  | 0.377420129 | 4.06136838 | 4.88E-05 | 0.001853 |
| ESR1       | 106.6219432 | -1.507979231 | 0.371586062 | -4.0582233 | 4.94E-05 | 0.001875 |
| ANKDD1A    | 116.8184675 | 1.715301924  | 0.42292793  | 4.0557783  | 5.00E-05 | 0.001891 |
| TRAF5      | 959.2000046 | 1.105285004  | 0.272945448 | 4.04947221 | 5.13E-05 | 0.001939 |
| HOPX       | 572.5028046 | -1.732827079 | 0.429998842 | -4.0298413 | 5.58E-05 | 0.002104 |
| EFHD2      | 1994.20591  | -1.229877664 | 0.305573366 | -4.0248196 | 5.70E-05 | 0.002146 |

|               |             |              |             |            |          |          |
|---------------|-------------|--------------|-------------|------------|----------|----------|
| RP11-305L7.1  | 31.56062642 | -2.389042746 | 0.59398336  | -4.0220702 | 5.77E-05 | 0.002167 |
| DLEC1         | 56.25903188 | -2.033519189 | 0.505793657 | -4.0204521 | 5.81E-05 | 0.002178 |
| BIN1          | 412.7167661 | -1.264437064 | 0.314774884 | -4.0169567 | 5.90E-05 | 0.002206 |
| DISC1         | 127.0296083 | 1.578799608  | 0.393268921 | 4.01455473 | 5.96E-05 | 0.002224 |
| GGT7          | 25.3359325  | -2.744042291 | 0.684946979 | -4.0062112 | 6.17E-05 | 0.0023   |
| RP11-81H14.1  | 49.54669768 | -2.481334287 | 0.619829996 | -4.0032498 | 6.25E-05 | 0.002325 |
| INPP5B        | 630.6455232 | 1.118801196  | 0.279522144 | 4.00254942 | 6.27E-05 | 0.002327 |
| TNFAIP8L1     | 148.4750774 | 1.438044252  | 0.35943715  | 4.00082255 | 6.31E-05 | 0.00234  |
| MCM6          | 177.446596  | -1.755672417 | 0.439299338 | -3.9965287 | 6.43E-05 | 0.002378 |
| SPN           | 1840.619884 | -1.069866811 | 0.267906411 | -3.9934349 | 6.51E-05 | 0.002405 |
| NECTIN1       | 23.15694264 | -3.336068125 | 0.835537748 | -3.9927198 | 6.53E-05 | 0.002408 |
| CMTM7         | 116.1062743 | 1.880803862  | 0.47119236  | 3.99158395 | 6.56E-05 | 0.002415 |
| HLA-DMB       | 112.2398926 | 1.618418729  | 0.405736118 | 3.9888456  | 6.64E-05 | 0.002438 |
| C16orf45      | 15.65260087 | -3.384643705 | 0.84895939  | -3.9868146 | 6.70E-05 | 0.002455 |
| TRAC          | 158.7453762 | 1.775529799  | 0.446832668 | 3.97358995 | 7.08E-05 | 0.002589 |
| TOB1          | 153.0483151 | -1.801607953 | 0.453433238 | -3.9732596 | 7.09E-05 | 0.002589 |
| LINC00944     | 26.99727998 | -3.831916894 | 0.966771995 | -3.9636201 | 7.38E-05 | 0.002691 |
| OR7E2P        | 7.853102008 | -6.193462259 | 1.563082563 | -3.9623385 | 7.42E-05 | 0.0027   |
| ZNF365        | 12.36147154 | -4.279780172 | 1.080769074 | -3.9599395 | 7.50E-05 | 0.002723 |
| RP11-736K20.4 | 14.10389364 | -4.480961669 | 1.131759252 | -3.9592887 | 7.52E-05 | 0.002725 |
| BCL2A1        | 124.726138  | 1.542111132  | 0.390341876 | 3.95066793 | 7.79E-05 | 0.00282  |
| ARRB2         | 396.3709634 | -1.139838069 | 0.288754022 | -3.9474362 | 7.90E-05 | 0.002853 |
| SYNRG         | 1833.131838 | 1.070168026  | 0.271881853 | 3.936151   | 8.28E-05 | 0.002985 |
| RCAN3         | 92.76134775 | 1.645521668  | 0.418568546 | 3.93130751 | 8.45E-05 | 0.00304  |
| MEIS1         | 26.81344668 | -2.858132542 | 0.728347843 | -3.9241313 | 8.70E-05 | 0.003127 |
| MYC           | 65.74177695 | 1.812834337  | 0.462350758 | 3.92090703 | 8.82E-05 | 0.003163 |
| RP11-1055B8.4 | 17.65302623 | -3.727505454 | 0.952919677 | -3.911668  | 9.17E-05 | 0.003281 |
| CYTH3         | 252.542155  | 1.316774452  | 0.336838199 | 3.90921949 | 9.26E-05 | 0.003308 |
| PLXNA2        | 15.67224392 | -3.892514806 | 0.996164697 | -3.9075013 | 9.33E-05 | 0.003326 |
| RPL34P20      | 34.30917405 | 2.212781988  | 0.567300197 | 3.90054859 | 9.60E-05 | 0.003416 |
| PCDHGA11      | 13.93659102 | -3.630764132 | 0.931576306 | -3.8974415 | 9.72E-05 | 0.003454 |
| ASB2          | 103.7215806 | 1.437187172  | 0.368959328 | 3.89524553 | 9.81E-05 | 0.003479 |
| CTD-2554C21.1 | 20.76757685 | 2.972342319  | 0.763953569 | 3.89073687 | 9.99E-05 | 0.003538 |
| DOCK5         | 708.5670373 | -4.407326284 | 1.134356595 | -3.8853094 | 0.000102 | 0.003612 |
| SIGLEC5       | 6.146843422 | 6.300311342  | 1.622400562 | 3.88332665 | 0.000103 | 0.003635 |
| RN7SL443P     | 9.985632763 | 4.586883174  | 1.181942478 | 3.88080068 | 0.000104 | 0.003653 |
| ARMC9         | 26.7727256  | 2.743985535  | 0.7070158   | 3.88108092 | 0.000104 | 0.003653 |
| RP11-75C9.2   | 6.315772186 | 6.336890894  | 1.632595721 | 3.88148199 | 0.000104 | 0.003653 |
| NUAK1         | 89.03415783 | -4.923768173 | 1.269853032 | -3.8774315 | 0.000106 | 0.003698 |
| GIPR          | 49.90489659 | -2.271641229 | 0.587837868 | -3.864401  | 0.000111 | 0.003894 |
| CH507-513H4.5 | 19.0567903  | 3.745700553  | 0.972859097 | 3.85019841 | 0.000118 | 0.00412  |
| CNN2          | 593.4786396 | 1.322235009  | 0.343668712 | 3.84741166 | 0.000119 | 0.004159 |
| SNX10         | 242.3358568 | 1.279673082  | 0.332794882 | 3.84523066 | 0.00012  | 0.004185 |
| DLL1          | 87.36929126 | 1.658729668  | 0.431392826 | 3.84505622 | 0.000121 | 0.004185 |
| PROCR         | 26.45366543 | -2.805026259 | 0.729650451 | -3.8443425 | 0.000121 | 0.00419  |
| PRR5L         | 1326.674747 | -1.234868418 | 0.321434033 | -3.8417476 | 0.000122 | 0.00419  |
| CLPTM1        | 411.5278394 | 1.34292923   | 0.34950235  | 3.84240401 | 0.000122 | 0.00419  |
| IFRD1         | 2699.957488 | 1.546278988  | 0.402491488 | 3.84176817 | 0.000122 | 0.00419  |

|                |             |              |             |            |          |          |
|----------------|-------------|--------------|-------------|------------|----------|----------|
| MTHFD2         | 163.1876685 | -1.525370396 | 0.397019633 | -3.8420528 | 0.000122 | 0.00419  |
| LFNG           | 399.2252516 | -1.59868108  | 0.416065683 | -3.8423767 | 0.000122 | 0.00419  |
| RP11-54O7.17   | 17.44336897 | -3.764751791 | 0.979707848 | -3.842729  | 0.000122 | 0.00419  |
| RP11-435O5.6   | 10.52049164 | -4.807950681 | 1.252268823 | -3.8393918 | 0.000123 | 0.004223 |
| PABPC1         | 3257.461736 | 1.166386588  | 0.304082885 | 3.83575218 | 0.000125 | 0.004279 |
| RP11-298J23.5  | 11.9087372  | -3.999220202 | 1.043491849 | -3.8325361 | 0.000127 | 0.004305 |
| U91324.1       | 32.27623017 | -2.521088311 | 0.657804027 | -3.8325827 | 0.000127 | 0.004305 |
| TBC1D30        | 34.52274449 | -2.188673158 | 0.571073011 | -3.8325628 | 0.000127 | 0.004305 |
| RP11-351D16.3  | 22.48772635 | -2.704422305 | 0.70564253  | -3.832567  | 0.000127 | 0.004305 |
| ATF3           | 190.7941236 | -1.762555728 | 0.459959472 | -3.8319805 | 0.000127 | 0.004308 |
| MICU3          | 59.13338922 | 1.737360905  | 0.453494993 | 3.8310476  | 0.000128 | 0.004317 |
| MORN3          | 29.24902237 | -2.236271213 | 0.584945518 | -3.8230419 | 0.000132 | 0.004452 |
| STN1           | 371.8815694 | 1.191965974  | 0.312226441 | 3.81763303 | 0.000135 | 0.004542 |
| ATP11A         | 171.2523947 | -1.675583948 | 0.439299068 | -3.8142215 | 0.000137 | 0.004598 |
| RP11-1105O14.1 | 8.243982175 | -6.268260315 | 1.643607537 | -3.8137208 | 0.000137 | 0.004599 |
| LILRP1         | 7.216270092 | -6.00472638  | 1.578242291 | -3.8046924 | 0.000142 | 0.004762 |
| ZBTB44         | 1247.08483  | -1.097954423 | 0.288959464 | -3.7996832 | 0.000145 | 0.004851 |
| HDAC7          | 768.5624003 | 1.061752137  | 0.279493383 | 3.79884534 | 0.000145 | 0.004852 |
| TPK1           | 99.11873832 | -1.522431898 | 0.400768119 | -3.7987849 | 0.000145 | 0.004852 |
| RP11-736K20.5  | 6.609111179 | -5.926249434 | 1.561025111 | -3.7963832 | 0.000147 | 0.004883 |
| ARHGAP31       | 251.1225738 | 1.388145972  | 0.365639615 | 3.7964868  | 0.000147 | 0.004883 |
| RP11-413E1.4   | 13.40928077 | -3.733891202 | 0.984273041 | -3.7935522 | 0.000149 | 0.004931 |
| KCNQ1OT1       | 291.0707352 | -1.232437835 | 0.325121743 | -3.7906964 | 0.00015  | 0.00498  |
| GCNT4          | 6.891303069 | -6.005539856 | 1.584846771 | -3.7893505 | 0.000151 | 0.004998 |
| HES6           | 76.86181731 | -1.837370916 | 0.485117397 | -3.7874769 | 0.000152 | 0.005028 |
| ZNF662         | 17.7849954  | 3.575613556  | 0.944347718 | 3.78633155 | 0.000153 | 0.00504  |
| FCGR2B         | 34.97465317 | -3.051624333 | 0.806015549 | -3.7860614 | 0.000153 | 0.00504  |
| TMTC4          | 65.69405615 | -1.589923334 | 0.420262869 | -3.783164  | 0.000155 | 0.00509  |
| TPST2          | 866.7897482 | -1.208960415 | 0.319760775 | -3.7808278 | 0.000156 | 0.005125 |
| ZCCHC24        | 78.09141368 | 1.520512577  | 0.402181723 | 3.78066056 | 0.000156 | 0.005125 |
| MXD1           | 366.4951192 | -1.324070455 | 0.35092991  | -3.7730339 | 0.000161 | 0.005275 |
| LINC00469      | 6.571609621 | -5.914799814 | 1.568023061 | -3.7721383 | 0.000162 | 0.005285 |
| IL10RA         | 2148.304468 | -1.311007704 | 0.347597299 | -3.771628  | 0.000162 | 0.005287 |
| ELMO1          | 394.5386972 | -1.185553481 | 0.314444052 | -3.7703161 | 0.000163 | 0.005306 |
| SLC35E1        | 494.0453718 | 1.341331033  | 0.356605986 | 3.76138115 | 0.000169 | 0.005491 |
| MICAL2         | 717.0636258 | 1.434424715  | 0.381618762 | 3.75878981 | 0.000171 | 0.005539 |
| ADRB2          | 880.089908  | -1.225287349 | 0.32604899  | -3.7579854 | 0.000171 | 0.005547 |
| SESN1          | 857.331721  | 1.198612199  | 0.319145377 | 3.75569344 | 0.000173 | 0.005571 |
| CD200R1        | 67.74310968 | 2.198311444  | 0.585298814 | 3.75587886 | 0.000173 | 0.005571 |
| HNRNPA1P70     | 14.87149842 | 3.424336918  | 0.911669688 | 3.7561158  | 0.000173 | 0.005571 |
| PCDHGB8P       | 11.60607838 | -4.037033378 | 1.075129895 | -3.7549262 | 0.000173 | 0.005579 |
| IFNAR2         | 335.1719381 | 1.239914836  | 0.33056866  | 3.75085417 | 0.000176 | 0.005661 |
| FAM102A        | 163.392481  | 1.287446427  | 0.344058393 | 3.74194164 | 0.000183 | 0.005856 |
| ADD3           | 1796.254427 | -1.228293062 | 0.328896712 | -3.734586  | 0.000188 | 0.006011 |
| IGFBP7         | 168.8582947 | -4.568837711 | 1.223300171 | -3.734846  | 0.000188 | 0.006011 |
| SGCD           | 13.62454309 | -4.236648183 | 1.134813633 | -3.7333427 | 0.000189 | 0.006031 |
| YBX3           | 34.24102106 | -2.48240698  | 0.665086184 | -3.7324591 | 0.00019  | 0.006042 |
| ZNF101P2       | 21.97429443 | -2.552751459 | 0.684665913 | -3.7284629 | 0.000193 | 0.006129 |

|               |             |              |             |            |          |          |
|---------------|-------------|--------------|-------------|------------|----------|----------|
| TENM1         | 649.1631813 | 1.035230936  | 0.277762319 | 3.72703878 | 0.000194 | 0.006154 |
| CCL25         | 13.38943681 | 3.591207682  | 0.963871472 | 3.72581593 | 0.000195 | 0.006174 |
| LPIN1         | 1835.869185 | 1.162779475  | 0.312619635 | 3.71947039 | 0.0002   | 0.006321 |
| C3AR1         | 61.00341117 | -1.812484427 | 0.487423539 | -3.7185    | 0.0002   | 0.006335 |
| WEE1          | 318.640766  | 1.278210218  | 0.344154554 | 3.71405871 | 0.000204 | 0.006437 |
| KCNC4         | 30.01462304 | -2.32576914  | 0.626301194 | -3.7134995 | 0.000204 | 0.006441 |
| FEZ1          | 255.1175407 | 1.378286918  | 0.371286081 | 3.71219657 | 0.000205 | 0.006464 |
| LINC00892     | 35.11558265 | 2.688604275  | 0.724901654 | 3.7089228  | 0.000208 | 0.006537 |
| FZD8          | 19.87966583 | -3.109399731 | 0.840102273 | -3.7012157 | 0.000215 | 0.006729 |
| COLQ          | 800.5898283 | 1.450538462  | 0.392472629 | 3.69589713 | 0.000219 | 0.00686  |
| USP31         | 84.60943467 | -1.446051753 | 0.391713669 | -3.691604  | 0.000223 | 0.006966 |
| RNF157        | 209.2207468 | 1.612889623  | 0.436960799 | 3.69115405 | 0.000223 | 0.006967 |
| TMEM181       | 1261.969643 | -0.973016796 | 0.26399211  | -3.6857798 | 0.000228 | 0.007105 |
| CCDC162P      | 20.00295842 | -2.787879662 | 0.757426507 | -3.6807263 | 0.000233 | 0.007236 |
| GS1-115G20.2  | 45.78694506 | -2.230820293 | 0.606389498 | -3.6788571 | 0.000234 | 0.007277 |
| MMP9          | 37.44072311 | 2.410775654  | 0.655639132 | 3.67698561 | 0.000236 | 0.00732  |
| C10orf10      | 24.51562269 | -2.472784171 | 0.672831433 | -3.6751912 | 0.000238 | 0.00736  |
| TKTL1         | 149.1948965 | -2.188348688 | 0.595749372 | -3.6732707 | 0.000239 | 0.007404 |
| RP11-80H8.4   | 24.52712255 | -2.752885338 | 0.750300076 | -3.6690458 | 0.000243 | 0.007515 |
| ATP2B1        | 913.6084668 | -1.091706262 | 0.297683274 | -3.6673416 | 0.000245 | 0.007554 |
| CCR9          | 208.9932691 | 1.604538924  | 0.437709868 | 3.66575908 | 0.000247 | 0.007577 |
| GPR34         | 28.13347947 | 2.220367169  | 0.60566387  | 3.66600565 | 0.000246 | 0.007577 |
| PHACTR2       | 278.4157835 | -1.472009274 | 0.402168849 | -3.6601773 | 0.000252 | 0.007732 |
| AP000654.4    | 6.425529869 | -5.899874519 | 1.614158006 | -3.6550787 | 0.000257 | 0.007875 |
| HNRNPA1P31    | 20.53252062 | 2.50364192   | 0.685430116 | 3.65265818 | 0.00026  | 0.007937 |
| IRF6          | 41.92307571 | -2.102068168 | 0.576706088 | -3.6449557 | 0.000267 | 0.008159 |
| CXXC4         | 12.27672259 | -4.097802967 | 1.124288001 | -3.6447983 | 0.000268 | 0.008159 |
| RP1-257C22.2  | 5.93496766  | -5.761755279 | 1.581086211 | -3.6441753 | 0.000268 | 0.008166 |
| HOOK1         | 72.42713049 | 2.052178651  | 0.563534357 | 3.64162118 | 0.000271 | 0.008234 |
| NEB           | 92.37068    | -1.432652924 | 0.393526787 | -3.6405474 | 0.000272 | 0.008256 |
| CTB-133G6.1   | 83.62184758 | -4.189817102 | 1.15176336  | -3.6377413 | 0.000275 | 0.008334 |
| MTM1          | 112.5793335 | 1.361859106  | 0.374477924 | 3.63668729 | 0.000276 | 0.008355 |
| INPP5A        | 97.69431359 | -1.832944287 | 0.504549348 | -3.6328345 | 0.00028  | 0.008468 |
| ADAM10        | 1858.771052 | -1.075168428 | 0.29615744  | -3.6303948 | 0.000283 | 0.008535 |
| GARNL3        | 20.44339593 | -2.661097908 | 0.733387099 | -3.6285038 | 0.000285 | 0.008585 |
| PABPC4        | 1008.089157 | 1.384480855  | 0.381748243 | 3.62668559 | 0.000287 | 0.008633 |
| KLF9          | 462.4621063 | -1.378414934 | 0.380818707 | -3.6196093 | 0.000295 | 0.008859 |
| KRTAP5-AS1    | 27.27781791 | -2.547041782 | 0.704329381 | -3.6162651 | 0.000299 | 0.00896  |
| ANKRD20A11P   | 166.5296481 | -5.154712828 | 1.42570454  | -3.6155548 | 0.0003   | 0.008971 |
| PARVG         | 516.8588873 | 0.990273811  | 0.273968272 | 3.61455654 | 0.000301 | 0.008992 |
| BAHCC1        | 38.41336259 | -2.696423845 | 0.747288981 | -3.6082746 | 0.000308 | 0.009199 |
| RP11-438B23.2 | 44.4979687  | -2.224492411 | 0.61662549  | -3.6075259 | 0.000309 | 0.009211 |
| KCNQ5-IT1     | 35.5641756  | 1.888449679  | 0.523849076 | 3.60494991 | 0.000312 | 0.009289 |
| RP11-214O1.2  | 91.9711049  | -1.887341147 | 0.523619323 | -3.6044146 | 0.000313 | 0.009294 |
| PTGFRN        | 35.12531225 | 2.416655875  | 0.670550242 | 3.60398926 | 0.000313 | 0.009296 |
| WDFY2         | 402.1668678 | -1.019651377 | 0.283142629 | -3.6011934 | 0.000317 | 0.009382 |
| RRM2          | 39.4856204  | -2.335809362 | 0.648889222 | -3.5997044 | 0.000319 | 0.009422 |
| MTHFD1L       | 41.99720889 | 1.869354521  | 0.519626602 | 3.59749581 | 0.000321 | 0.009488 |

|               |             |              |             |            |          |          |
|---------------|-------------|--------------|-------------|------------|----------|----------|
| RP11-467H10.2 | 14.45277978 | -3.655762545 | 1.016668767 | -3.5958246 | 0.000323 | 0.009535 |
| MPP1          | 61.2774592  | 1.522813031  | 0.424189207 | 3.58993818 | 0.000331 | 0.009738 |
| AC097713.4    | 8.694795904 | -5.348637343 | 1.49223009  | -3.5843248 | 0.000338 | 0.009925 |
| GPR15         | 71.7831699  | 2.119045814  | 0.591216095 | 3.58421537 | 0.000338 | 0.009925 |
| C2orf48       | 5.740653114 | -5.709628287 | 1.594628623 | -3.5805379 | 0.000343 | 0.010051 |
| TANC1         | 558.2546435 | 3.155662729  | 0.882313803 | 3.5765764  | 0.000348 | 0.010174 |
| PTPRD-AS1     | 11.82585468 | 3.526727821  | 0.98598779  | 3.57684736 | 0.000348 | 0.010174 |
| HEG1          | 1725.170045 | 0.995746207  | 0.278639501 | 3.57360031 | 0.000352 | 0.010275 |
| UBASH3B       | 564.2660856 | 1.127704964  | 0.315783221 | 3.57113643 | 0.000355 | 0.010357 |
| PRMT9         | 278.7307551 | 1.145632561  | 0.321152481 | 3.56725428 | 0.000361 | 0.010496 |
| RAB29         | 550.7787659 | -1.062992123 | 0.29832396  | -3.563214  | 0.000366 | 0.010643 |
| CD47          | 2083.819326 | -1.13948982  | 0.320276732 | -3.5578289 | 0.000374 | 0.010848 |
| IKZF3         | 5563.007635 | 1.066920745  | 0.300101785 | 3.55519626 | 0.000378 | 0.010925 |
| AC004593.3    | 68.00735062 | 1.748540894  | 0.491806023 | 3.55534665 | 0.000377 | 0.010925 |
| PARP3         | 89.62996921 | 1.464640911  | 0.412309088 | 3.55228869 | 0.000382 | 0.011103 |
| CATSPER1      | 22.28363001 | -2.472576872 | 0.696639208 | -3.5492933 | 0.000386 | 0.011114 |
| SPAG4         | 200.8171321 | 1.409823498  | 0.397527008 | 3.54648481 | 0.00039  | 0.011243 |
| RP11-862L9.2  | 47.91274894 | -2.018134345 | 0.569165369 | -3.5457785 | 0.000391 | 0.011257 |
| PLCG2         | 3296.470605 | 1.046530527  | 0.295264262 | 3.54438604 | 0.000394 | 0.0113   |
| OSBPL2        | 843.0618569 | 0.933095462  | 0.263802101 | 3.53710398 | 0.000405 | 0.011589 |
| CH507-42P11.8 | 118.4926675 | 1.729887774  | 0.489090152 | 3.53695074 | 0.000405 | 0.011589 |
| RGS10         | 23.08125368 | -2.418922927 | 0.685219456 | -3.5301434 | 0.000415 | 0.011875 |
| C11orf63      | 25.8146242  | 2.298261326  | 0.651176465 | 3.52939864 | 0.000417 | 0.011891 |
| PTGER2        | 757.4352553 | -1.108074119 | 0.314136508 | -3.527365  | 0.00042  | 0.011965 |
| YWHAH         | 304.2280503 | 1.338540981  | 0.379568661 | 3.52647918 | 0.000421 | 0.011988 |
| CEBPA         | 29.2059735  | -2.902816524 | 0.823516581 | -3.5249036 | 0.000424 | 0.012042 |
| HIVEP2        | 1026.809882 | 1.131226987  | 0.321216047 | 3.52170135 | 0.000429 | 0.012171 |
| KRT2          | 13.73397377 | -3.582502069 | 1.0182041   | -3.5184518 | 0.000434 | 0.012303 |
| KAT2B         | 1216.143443 | -0.983953671 | 0.279711184 | -3.5177488 | 0.000435 | 0.012318 |
| VLDLR         | 45.54370524 | -2.097335537 | 0.596590263 | -3.5155377 | 0.000439 | 0.012404 |
| KLF13         | 2584.471279 | -1.111949568 | 0.316360975 | -3.5148127 | 0.00044  | 0.01242  |
| NDC80         | 32.47207675 | -2.334934444 | 0.665400709 | -3.5090652 | 0.00045  | 0.012673 |
| ZFYVE28       | 318.558651  | -1.578925774 | 0.450280984 | -3.5065344 | 0.000454 | 0.012776 |
| CXCR1         | 64.3978748  | -5.239959512 | 1.496885413 | -3.5005749 | 0.000464 | 0.013047 |
| SURF4         | 1334.116026 | 1.264782493  | 0.361395603 | 3.49971744 | 0.000466 | 0.01307  |
| PCNX2         | 108.1590252 | -1.617562631 | 0.462329168 | -3.498725  | 0.000467 | 0.013082 |
| GSAP          | 2174.09228  | -1.192658042 | 0.340880228 | -3.4987598 | 0.000467 | 0.013082 |
| SCMH1         | 123.3480363 | 1.268399266  | 0.362604201 | 3.49802695 | 0.000469 | 0.013097 |
| PRKCB         | 1646.62345  | -0.999381928 | 0.285788516 | -3.4969282 | 0.000471 | 0.013132 |
| ST7           | 33.78063387 | -1.865631776 | 0.533561501 | -3.4965637 | 0.000471 | 0.013132 |
| CHST2         | 1342.549037 | -1.650877533 | 0.472239815 | -3.4958457 | 0.000473 | 0.013149 |
| PHLDA1        | 194.3461047 | -1.33524682  | 0.382050895 | -3.4949449 | 0.000474 | 0.013175 |
| GNAO1         | 19.9185251  | -3.598196445 | 1.030447258 | -3.4918783 | 0.00048  | 0.013293 |
| TP53INP1      | 547.3281094 | 1.296168576  | 0.371201611 | 3.49181829 | 0.00048  | 0.013293 |
| PODXL         | 37.26326114 | -1.781301443 | 0.510336972 | -3.4904417 | 0.000482 | 0.013324 |
| SRPK2         | 662.4761147 | -0.936561563 | 0.26830237  | -3.4906943 | 0.000482 | 0.013324 |
| DCBLD1        | 175.1049608 | 1.444075862  | 0.413991723 | 3.48817568 | 0.000486 | 0.013419 |
| RRBP1         | 520.2817868 | -1.128073668 | 0.323791728 | -3.4839484 | 0.000494 | 0.013614 |

|               |             |              |             |            |          |          |
|---------------|-------------|--------------|-------------|------------|----------|----------|
| TIPARP        | 3201.56838  | 1.135838915  | 0.326522583 | 3.47859222 | 0.000504 | 0.01385  |
| S1PR2         | 82.40873929 | 1.685944943  | 0.484646596 | 3.47870997 | 0.000504 | 0.01385  |
| MT-ND6        | 61.42535317 | 2.543274626  | 0.731882362 | 3.47497734 | 0.000511 | 0.014018 |
| SLC2A6        | 32.14417211 | -2.227843293 | 0.641273199 | -3.4740939 | 0.000513 | 0.014045 |
| RP11-214O1.3  | 19.70712014 | -2.837155424 | 0.816753953 | -3.4736966 | 0.000513 | 0.014046 |
| PGRMC2        | 258.4643982 | 1.126716155  | 0.324449687 | 3.47269915 | 0.000515 | 0.014079 |
| OTOF          | 7.637099175 | -5.235854282 | 1.510262527 | -3.4668504 | 0.000527 | 0.014369 |
| MTATP6P1      | 18.85188229 | 3.115706761  | 0.898842192 | 3.4663557  | 0.000528 | 0.014376 |
| GPR68         | 384.5861412 | 1.222000266  | 0.352602047 | 3.46566413 | 0.000529 | 0.014393 |
| CYBRD1        | 96.49600531 | -4.365114656 | 1.260130889 | -3.4640169 | 0.000532 | 0.01446  |
| CTD-2017C7.1  | 35.00208287 | -2.137668079 | 0.617168756 | -3.4636687 | 0.000533 | 0.01446  |
| MAGEF1        | 57.44259211 | -1.67217411  | 0.48309013  | -3.4614123 | 0.000537 | 0.014562 |
| PACSIN1       | 6.942256741 | -5.063434595 | 1.463539485 | -3.4597185 | 0.000541 | 0.014634 |
| SH2D3A        | 76.62330033 | 1.58112501   | 0.457598551 | 3.45526665 | 0.00055  | 0.014837 |
| LINC00539     | 37.83509753 | 1.88321142   | 0.545000227 | 3.45543236 | 0.000549 | 0.014837 |
| CHKA          | 222.5719555 | 1.41079237   | 0.408558337 | 3.45309896 | 0.000554 | 0.014937 |
| DENND4A       | 1836.01788  | 0.891794259  | 0.258508568 | 3.44976673 | 0.000561 | 0.015102 |
| BCL9L         | 421.5562256 | -1.363565378 | 0.395345398 | -3.4490483 | 0.000563 | 0.015121 |
| KCTD5         | 260.1397774 | 1.094682726  | 0.317826818 | 3.44427425 | 0.000573 | 0.01537  |
| VMP1          | 765.4684671 | -1.206616031 | 0.350571397 | -3.4418553 | 0.000578 | 0.015487 |
| LRIT2         | 9.829901021 | 3.820292972  | 1.110401849 | 3.44045984 | 0.000581 | 0.015546 |
| AK5           | 80.62098828 | -4.056625438 | 1.179594727 | -3.4389993 | 0.000584 | 0.015609 |
| CTD-2060C23.1 | 5.658541271 | -5.664406158 | 1.647334333 | -3.4385286 | 0.000585 | 0.015615 |
| P2RY11        | 124.6864791 | 1.251954341  | 0.364611557 | 3.43366609 | 0.000595 | 0.015855 |
| IL12RB2       | 1132.083831 | 1.35835306   | 0.395567108 | 3.43393835 | 0.000595 | 0.015855 |
| NFATC2        | 1627.139066 | -1.018514724 | 0.297175105 | -3.4273218 | 0.00061  | 0.016208 |
| EDARADD       | 8.373233509 | -4.661264869 | 1.360985399 | -3.4249191 | 0.000615 | 0.01633  |
| ERFE          | 17.46399497 | -2.585902958 | 0.755447667 | -3.4230074 | 0.000619 | 0.016423 |
| VANGL1        | 246.4796447 | 1.157261177  | 0.338375026 | 3.42005494 | 0.000626 | 0.01658  |
| GALC          | 671.3597966 | -1.128432881 | 0.330270359 | -3.4166944 | 0.000634 | 0.016764 |
| LMNA          | 240.2703728 | -1.890835496 | 0.553581438 | -3.4156411 | 0.000636 | 0.016806 |
| HIPK1-AS1     | 265.1789497 | 1.398616612  | 0.409918513 | 3.41193815 | 0.000645 | 0.017014 |
| HSPA8P4       | 7.503085995 | -5.093726355 | 1.49465632  | -3.4079583 | 0.000655 | 0.017241 |
| BEND3P1       | 27.49451825 | 2.264789447  | 0.664993115 | 3.40573368 | 0.00066  | 0.017359 |
| TRPC3         | 10.2659155  | -4.746279574 | 1.394882375 | -3.4026379 | 0.000667 | 0.017533 |
| RP11-69E11.8  | 61.96600415 | 1.559374102  | 0.458525137 | 3.40084758 | 0.000672 | 0.017625 |
| SIPA1L1       | 952.9646283 | 1.198258265  | 0.352511158 | 3.39920663 | 0.000676 | 0.017707 |
| CASP8         | 1001.249446 | -0.99148645  | 0.291918978 | -3.396444  | 0.000683 | 0.017863 |
| RP11-864I4.3  | 14.85789468 | -3.236399211 | 0.953126791 | -3.39556   | 0.000685 | 0.017898 |
| LINC00943     | 28.10752872 | -3.008407241 | 0.886142407 | -3.3949478 | 0.000686 | 0.017908 |
| GCLM          | 172.64561   | -1.14066219  | 0.336015472 | -3.3946716 | 0.000687 | 0.017908 |
| HMGA2         | 26.76641201 | 2.040957092  | 0.60139314  | 3.39371528 | 0.00069  | 0.017947 |
| SPATS2L       | 46.95508098 | 1.548237988  | 0.456491085 | 3.39160619 | 0.000695 | 0.018062 |
| RN7SL748P     | 8.795602307 | -4.462881627 | 1.316512228 | -3.389928  | 0.000699 | 0.018149 |
| S1PR4         | 288.7476373 | -1.218247901 | 0.359479193 | -3.3889247 | 0.000702 | 0.018168 |
| LRP12         | 71.03983875 | 1.390840887  | 0.410371308 | 3.38922547 | 0.000701 | 0.018168 |
| MAPK3         | 114.4865806 | 1.192282545  | 0.35190794  | 3.38805241 | 0.000704 | 0.018202 |
| CARNS1        | 125.9594485 | -1.50944244  | 0.445566344 | -3.387694  | 0.000705 | 0.018202 |



|               |             |              |             |            |          |          |
|---------------|-------------|--------------|-------------|------------|----------|----------|
| UACA          | 66.97122452 | 1.683058884  | 0.497944829 | 3.38001077 | 0.000725 | 0.01867  |
| HPSE          | 15.42402657 | -3.462214986 | 1.024227264 | -3.3803191 | 0.000724 | 0.01867  |
| S100PBP       | 1063.4098   | 0.99328226   | 0.294197187 | 3.37624663 | 0.000735 | 0.018894 |
| HLA-DRB1      | 133.4977633 | -1.70688283  | 0.505591442 | -3.3760121 | 0.000735 | 0.018894 |
| TXNRD3        | 44.27031565 | 1.821175278  | 0.539729732 | 3.3742356  | 0.00074  | 0.018992 |
| OPHN1         | 61.6087124  | -1.733375771 | 0.51415359  | -3.371319  | 0.000748 | 0.019169 |
| DUSP8         | 54.26779974 | -2.47166128  | 0.734654406 | -3.3643864 | 0.000767 | 0.019632 |
| SAMHD1        | 1560.229499 | -1.150919877 | 0.342523539 | -3.3601191 | 0.000779 | 0.019912 |
| CTA-292E10.6  | 136.2548704 | 1.283774814  | 0.38247339  | 3.35650754 | 0.000789 | 0.020147 |
| CCDC112       | 10.00200928 | -3.595377401 | 1.071742342 | -3.3547031 | 0.000795 | 0.020253 |
| RGS12         | 27.09478698 | -2.926968613 | 0.872714306 | -3.353868  | 0.000797 | 0.020288 |
| SLC25A20      | 295.615079  | -1.108530566 | 0.330885377 | -3.3501951 | 0.000808 | 0.020533 |
| IRAK2         | 360.0836227 | 1.155162571  | 0.344988978 | 3.34840428 | 0.000813 | 0.020639 |
| GLCC11        | 737.7445408 | 0.97280885   | 0.290846708 | 3.34474767 | 0.000824 | 0.020886 |
| MLC1          | 629.6383686 | -0.999992267 | 0.29916659  | -3.3425934 | 0.00083  | 0.020995 |
| PPFIA3        | 13.52945839 | -3.092545253 | 0.925130658 | -3.34282   | 0.000829 | 0.020995 |
| STX7          | 402.3398216 | -1.202423851 | 0.359909984 | -3.3409016 | 0.000835 | 0.021097 |
| PDXK          | 488.4970881 | 0.99423569   | 0.297633378 | 3.34047108 | 0.000836 | 0.021102 |
| VIT           | 5.674050352 | -5.709344999 | 1.709717786 | -3.3393494 | 0.00084  | 0.021161 |
| ENTPD1        | 222.381585  | 1.62417226   | 0.486860029 | 3.33601479 | 0.00085  | 0.021389 |
| CD81          | 1083.619061 | 1.094175547  | 0.328353116 | 3.33231357 | 0.000861 | 0.02162  |
| AXIN1         | 847.2866719 | -1.40532067  | 0.421686081 | -3.3326229 | 0.00086  | 0.02162  |
| LARGE1        | 16.04819682 | -3.004609516 | 0.902277907 | -3.3300267 | 0.000868 | 0.021771 |
| SLITRK5       | 5.11963225  | -5.517561378 | 1.658238792 | -3.3273624 | 0.000877 | 0.021953 |
| TGFBR3        | 1936.737911 | -0.922983559 | 0.277527557 | -3.3257366 | 0.000882 | 0.021966 |
| CHPT1         | 176.3249387 | 1.45198772   | 0.436503848 | 3.32640302 | 0.00088  | 0.021966 |
| FMNL3         | 1016.816928 | 1.013328013  | 0.304720368 | 3.32543577 | 0.000883 | 0.021966 |
| ZNF528-AS1    | 40.00957286 | 1.867237615  | 0.561490714 | 3.32550044 | 0.000883 | 0.021966 |
| UBE2F         | 240.9959224 | -1.257495743 | 0.37798673  | -3.3268251 | 0.000878 | 0.021966 |
| PCID2         | 282.9661204 | -0.977151473 | 0.293906489 | -3.3247019 | 0.000885 | 0.021996 |
| TBX1          | 6.436457212 | -4.943000028 | 1.487549098 | -3.3229155 | 0.000891 | 0.022109 |
| PARP9         | 373.935695  | -0.997730525 | 0.300475444 | -3.320506  | 0.000899 | 0.022273 |
| GNS           | 816.4935322 | -0.987096633 | 0.297309548 | -3.3200973 | 0.0009   | 0.022274 |
| SLFN13        | 2450.135107 | 0.946798325  | 0.28519827  | 3.31978986 | 0.000901 | 0.022274 |
| ABHD15        | 801.8555453 | 1.230662223  | 0.370948572 | 3.31760874 | 0.000908 | 0.022421 |
| PLK3          | 85.16867576 | -1.313817432 | 0.396213449 | -3.3159335 | 0.000913 | 0.022528 |
| CD69          | 6118.789048 | 1.102258101  | 0.332599038 | 3.31407484 | 0.000919 | 0.02265  |
| MAPK7         | 73.8541402  | -1.456520811 | 0.440471628 | -3.3067301 | 0.000944 | 0.023223 |
| UNG           | 222.6027477 | 1.325823939  | 0.401270931 | 3.30406176 | 0.000953 | 0.023416 |
| GPD1L         | 424.0935015 | 1.072475272  | 0.324687904 | 3.30309586 | 0.000956 | 0.023438 |
| ZSCAN1        | 6.268995741 | 5.516338117  | 1.669987537 | 3.30322113 | 0.000956 | 0.023438 |
| SH3BGRL3      | 197.2398897 | -1.198957969 | 0.363129333 | -3.3017381 | 0.000961 | 0.023523 |
| FN3K          | 37.16199523 | 1.749746579  | 0.530116915 | 3.30068053 | 0.000965 | 0.023583 |
| SLCO3A1       | 174.7602764 | -1.701593707 | 0.516565731 | -3.2940507 | 0.000988 | 0.024116 |
| RP1-15D23.2   | 10.8824573  | 3.37482427   | 1.025214395 | 3.29182294 | 0.000995 | 0.024278 |
| RNF122        | 138.4732019 | 1.175389283  | 0.357147916 | 3.29104337 | 0.000998 | 0.024315 |
| RP11-359K18.4 | 18.46044609 | -2.509498712 | 0.762705915 | -3.2902573 | 0.001001 | 0.024353 |
| ACP6          | 164.9327529 | 1.479787046  | 0.449929799 | 3.28892874 | 0.001006 | 0.024439 |

|              |             |              |             |            |          |          |
|--------------|-------------|--------------|-------------|------------|----------|----------|
| UST          | 284.4312508 | 1.258326452  | 0.383036919 | 3.28513099 | 0.001019 | 0.02474  |
| SCX          | 36.71136343 | 2.291739383  | 0.697741225 | 3.28451194 | 0.001022 | 0.024751 |
| ZNF853       | 115.9732582 | 1.179476108  | 0.359124535 | 3.28430946 | 0.001022 | 0.024751 |
| RP11-107E5.3 | 708.5152143 | -1.40224883  | 0.427143777 | -3.2828497 | 0.001028 | 0.024849 |
| RP11-107E5.4 | 83.74068631 | -1.748908476 | 0.533028128 | -3.281081  | 0.001034 | 0.024975 |
| SMIM24       | 8.174593367 | 4.622153629  | 1.408885111 | 3.28071721 | 0.001035 | 0.024977 |
| CTC-506B8.1  | 8.621740197 | -4.013237735 | 1.225186482 | -3.2756138 | 0.001054 | 0.025402 |
| CD38         | 1209.205809 | 0.957508371  | 0.292363615 | 3.27505996 | 0.001056 | 0.02542  |
| RP11-864I4.4 | 13.15433275 | -3.419782424 | 1.044614758 | -3.2737259 | 0.001061 | 0.02551  |
| PCSK6        | 24.97572191 | 2.863828823  | 0.877154113 | 3.26490953 | 0.001095 | 0.026285 |
| ADAM12       | 32.28123139 | -1.905381497 | 0.583882006 | -3.2632989 | 0.001101 | 0.026403 |
| RP11-39H3.2  | 5.323114708 | -5.617252238 | 1.723694018 | -3.2588454 | 0.001119 | 0.026724 |
| RNU1-120P    | 5.287832609 | 5.280183237  | 1.620198032 | 3.25897399 | 0.001118 | 0.026724 |
| BAZ2B        | 1417.795117 | 1.08433858   | 0.332697497 | 3.25923276 | 0.001117 | 0.026724 |
| PDCD4        | 2092.231113 | 1.095670031  | 0.336255755 | 3.25844247 | 0.00112  | 0.026729 |
| JAZF1        | 256.6649725 | -1.05047167  | 0.322493415 | -3.257343  | 0.001125 | 0.026801 |
| ABCD2        | 15.7577182  | -3.36659213  | 1.0346003   | -3.2540027 | 0.001138 | 0.027085 |
| LRRC8A       | 313.0160462 | -1.059429169 | 0.326101906 | -3.2487672 | 0.001159 | 0.027555 |
| LINC00384    | 5.249978887 | -5.606981497 | 1.726745117 | -3.247139  | 0.001166 | 0.02768  |
| ADRB1        | 66.74433272 | 1.868897574  | 0.575692832 | 3.24634505 | 0.001169 | 0.027698 |
| ZNF154       | 345.6036921 | 1.230949275  | 0.379188985 | 3.24626854 | 0.001169 | 0.027698 |
| C10orf11     | 21.67666926 | 2.073593438  | 0.638891627 | 3.2456106  | 0.001172 | 0.027729 |
| RP11-413E1.2 | 9.863906006 | -3.489088941 | 1.076399969 | -3.2414428 | 0.001189 | 0.028104 |
| SLC24A3      | 3.995777949 | 5.733133779  | 1.770236627 | 3.23862567 | 0.001201 | 0.028349 |
| JAML         | 133.7218907 | 1.550378404  | 0.479718762 | 3.23184859 | 0.00123  | 0.028996 |
| CYP4F35P     | 7.991481439 | -3.975171157 | 1.230307568 | -3.2310385 | 0.001233 | 0.029043 |
| ERGIC1       | 1278.183439 | 1.052202471  | 0.326209531 | 3.22554178 | 0.001257 | 0.029572 |
| RPL21        | 212.1326477 | 1.096053278  | 0.34019213  | 3.22186548 | 0.001274 | 0.029918 |
| SGO1         | 25.14663842 | -2.195255874 | 0.681678162 | -3.22037   | 0.00128  | 0.030039 |
| SLC25A4      | 79.64201018 | -1.510327144 | 0.470391328 | -3.2107887 | 0.001324 | 0.031022 |
| PPP1R26      | 66.52614762 | 1.443363372  | 0.449677045 | 3.20977774 | 0.001328 | 0.031057 |
| SLC6A6       | 522.827118  | 0.886287565  | 0.276096468 | 3.21006484 | 0.001327 | 0.031057 |
| UOX          | 5.289621438 | -5.613984083 | 1.750592753 | -3.2069047 | 0.001342 | 0.031332 |
| RP11-640L9.2 | 31.23376866 | -1.899536759 | 0.592795172 | -3.2043729 | 0.001354 | 0.031572 |
| ARF4P4       | 16.62130025 | 2.485104332  | 0.775915449 | 3.202803   | 0.001361 | 0.031707 |
| WDR27        | 315.840991  | 0.962585343  | 0.300607217 | 3.2021365  | 0.001364 | 0.031743 |
| ECHDC3       | 6.718613243 | 4.126755586  | 1.28947136  | 3.20034683 | 0.001373 | 0.031903 |
| FBP1         | 46.20358513 | 1.485076967  | 0.464184331 | 3.19932593 | 0.001377 | 0.031979 |
| EPS8L2       | 35.06953832 | 1.624649705  | 0.507969124 | 3.19832374 | 0.001382 | 0.032028 |
| PCDHGB5      | 22.01625623 | -2.045302637 | 0.639516417 | -3.1982019 | 0.001383 | 0.032028 |
| TTC22        | 105.3106534 | -1.250278034 | 0.3910193   | -3.1974842 | 0.001386 | 0.03207  |
| SEMA6C       | 18.54390387 | -2.601265536 | 0.814088963 | -3.1953087 | 0.001397 | 0.032258 |
| HEMGN        | 10.10289577 | 3.810347463  | 1.192550302 | 3.19512515 | 0.001398 | 0.032258 |
| RAB38        | 17.18356582 | -2.566167817 | 0.803553284 | -3.1935254 | 0.001405 | 0.0324   |
| YPEL5        | 4897.003358 | 1.30205303   | 0.408217838 | 3.18960346 | 0.001425 | 0.032804 |
| CTB-91J4.1   | 11.2630347  | -3.487124889 | 1.094421503 | -3.1862723 | 0.001441 | 0.033146 |
| FOS          | 21800.79065 | 1.25182993   | 0.39301279  | 3.18521423 | 0.001446 | 0.033228 |
| CARD16       | 118.8016498 | -1.439957781 | 0.453759781 | -3.1733923 | 0.001507 | 0.034572 |

|               |             |              |             |            |          |          |
|---------------|-------------|--------------|-------------|------------|----------|----------|
| IQGAP2        | 2935.198658 | -0.845452275 | 0.266597034 | -3.1712741 | 0.001518 | 0.034784 |
| SFRP4         | 5.247344034 | -5.58100989  | 1.760508718 | -3.170112  | 0.001524 | 0.034883 |
| EIF4G3        | 898.1424133 | -0.914401144 | 0.288585295 | -3.1685646 | 0.001532 | 0.03497  |
| MZF1          | 228.4922023 | 1.112205897  | 0.351144406 | 3.16737467 | 0.001538 | 0.03497  |
| OTULIN        | 1500.885562 | 0.994480848  | 0.313926952 | 3.16787342 | 0.001536 | 0.03497  |
| ZBTB10        | 1544.148106 | 1.033955387  | 0.326398311 | 3.16777187 | 0.001536 | 0.03497  |
| NRXN2         | 7.154577879 | -4.942355157 | 1.560198464 | -3.1677734 | 0.001536 | 0.03497  |
| METTL9        | 696.0070555 | 0.963750248  | 0.304271989 | 3.1673972  | 0.001538 | 0.03497  |
| PGM5          | 11.27386029 | 3.19354954   | 1.009958383 | 3.16206053 | 0.001567 | 0.035574 |
| SLC37A1       | 325.1613982 | 1.132333215  | 0.358218415 | 3.16101341 | 0.001572 | 0.035661 |
| ERRF1         | 51.39917557 | -2.040578004 | 0.64588856  | -3.1593345 | 0.001581 | 0.035785 |
| ZNF415        | 27.60187297 | 1.94640208   | 0.616044608 | 3.15951484 | 0.00158  | 0.035785 |
| OBSCN         | 351.8437774 | 1.174804549  | 0.372076845 | 3.15742451 | 0.001592 | 0.035979 |
| KIT           | 14.15736641 | -2.758200064 | 0.874685231 | -3.153363  | 0.001614 | 0.036441 |
| GSTP1         | 944.6763203 | 1.003519563  | 0.318271029 | 3.15303459 | 0.001616 | 0.036441 |
| ZNF609        | 1551.425636 | 0.916061005  | 0.29059123  | 3.15240417 | 0.001619 | 0.036478 |
| MZF1-AS1      | 68.10393943 | 1.598898081  | 0.507477255 | 3.15067929 | 0.001629 | 0.036652 |
| ZDHHC3        | 503.0418308 | 0.87840028   | 0.278910832 | 3.14939465 | 0.001636 | 0.036772 |
| HIST1H1D      | 655.0458888 | -1.031283249 | 0.327538162 | -3.1485896 | 0.001641 | 0.036832 |
| RAP1B         | 987.9067763 | -0.923476914 | 0.293345941 | -3.1480814 | 0.001643 | 0.036854 |
| ABCD1         | 172.3507256 | 1.230597962  | 0.39110238  | 3.14648548 | 0.001652 | 0.037001 |
| AKAP12        | 59.14721951 | 1.557336942  | 0.4950331   | 3.14592487 | 0.001656 | 0.037001 |
| AC006369.2    | 6.638828107 | -4.903424377 | 1.558511703 | -3.1462224 | 0.001654 | 0.037001 |
| RNA5SP390     | 4.422153029 | -5.318490813 | 1.692087128 | -3.1431542 | 0.001671 | 0.03731  |
| RNF130        | 151.0964104 | -1.080768032 | 0.343895615 | -3.1427212 | 0.001674 | 0.037323 |
| ATP10D        | 592.0707002 | 0.876602062  | 0.279582554 | 3.13539615 | 0.001716 | 0.038188 |
| XPNPEP2       | 7.698152946 | -4.31760463  | 1.377363149 | -3.1346886 | 0.00172  | 0.038188 |
| HIST4H4       | 448.1479891 | 1.093426417  | 0.348771535 | 3.13507929 | 0.001718 | 0.038188 |
| LIPC-AS1      | 5.245888793 | -5.614145574 | 1.79096887  | -3.1346975 | 0.00172  | 0.038188 |
| MIR7845       | 8.173248066 | -3.73643248  | 1.192659475 | -3.1328577 | 0.001731 | 0.038326 |
| CALCB         | 8.742339926 | -3.608172377 | 1.151796838 | -3.1326465 | 0.001732 | 0.038326 |
| RP11-76C10.3  | 5.489362486 | 5.328765009  | 1.700732443 | 3.13321771 | 0.001729 | 0.038326 |
| PRELID2       | 13.42879981 | 2.689572437  | 0.859133093 | 3.13056552 | 0.001745 | 0.038555 |
| PIK3R1        | 6454.893034 | 1.157111884  | 0.369733428 | 3.12958418 | 0.001751 | 0.038641 |
| TMEM184B      | 272.253837  | -1.157132715 | 0.36978242  | -3.1292259 | 0.001753 | 0.038645 |
| LINC01128     | 105.1081204 | 1.220035828  | 0.389980448 | 3.12845384 | 0.001757 | 0.038703 |
| SLC38A4       | 23.52042114 | -2.072995661 | 0.662778226 | -3.1277365 | 0.001762 | 0.038755 |
| TLE4          | 801.7712605 | -0.863730976 | 0.276461666 | -3.1242341 | 0.001783 | 0.039175 |
| ZNF827        | 277.8891365 | 1.11499993   | 0.357057009 | 3.12275043 | 0.001792 | 0.03933  |
| ZFP36         | 4477.077085 | 1.284591079  | 0.411491628 | 3.12179153 | 0.001798 | 0.039376 |
| NEDD9         | 1548.861105 | 0.806224475  | 0.258260184 | 3.12175289 | 0.001798 | 0.039376 |
| IFITM3        | 78.51859584 | 1.322939917  | 0.423843257 | 3.12129518 | 0.001801 | 0.039393 |
| DENND1B       | 977.3729852 | 0.919409262  | 0.294688958 | 3.11993116 | 0.001809 | 0.039532 |
| MT-ND5        | 413.6557266 | 1.565919571  | 0.502777008 | 3.11454093 | 0.001842 | 0.040217 |
| RP11-739B23.1 | 21.56484392 | 2.303420993  | 0.741215163 | 3.107628   | 0.001886 | 0.041125 |
| SMIM3         | 33.87935989 | -2.049956885 | 0.661039522 | -3.1011109 | 0.001928 | 0.041948 |
| CSGALNACT1    | 143.3067423 | -5.394137692 | 1.739284066 | -3.1013552 | 0.001926 | 0.041948 |
| CRBN          | 522.8506267 | -0.949590549 | 0.306257082 | -3.1006321 | 0.001931 | 0.04197  |

|               |             |              |             |            |          |          |
|---------------|-------------|--------------|-------------|------------|----------|----------|
| FAM131B       | 11.4411843  | -3.27651585  | 1.057123807 | -3.0994627 | 0.001939 | 0.042089 |
| CTD-3060P21.1 | 28.83529106 | -5.497248274 | 1.773844662 | -3.0990584 | 0.001941 | 0.042101 |
| CYB561        | 35.63793359 | -1.859006659 | 0.600161579 | -3.0975103 | 0.001952 | 0.042275 |
| PCNT          | 1091.599795 | -1.208460715 | 0.39033191  | -3.0959824 | 0.001962 | 0.042447 |
| GRAMD4        | 324.849983  | -1.001288005 | 0.323465159 | -3.095505  | 0.001965 | 0.042469 |
| ITPRIP        | 1130.985764 | -1.545490286 | 0.499527821 | -3.0939023 | 0.001975 | 0.042652 |
| GPD2          | 486.358469  | 0.860554497  | 0.278280836 | 3.09239583 | 0.001985 | 0.042822 |
| PCDHGC5       | 9.180811127 | -3.276099058 | 1.059932399 | -3.0908566 | 0.001996 | 0.042998 |
| CERS6         | 324.7523651 | 0.965755319  | 0.312511572 | 3.09030258 | 0.002    | 0.043031 |
| ZNF331        | 1440.294709 | 1.489122058  | 0.482764456 | 3.08457269 | 0.002038 | 0.043821 |
| PLS1          | 13.29165538 | -2.787144227 | 0.90420335  | -3.0824308 | 0.002053 | 0.044042 |
| DTX3L         | 665.377439  | -0.870825937 | 0.282485425 | -3.0827287 | 0.002051 | 0.044042 |
| SMS           | 89.55444368 | 1.172468232  | 0.380620185 | 3.08041527 | 0.002067 | 0.044293 |
| RHBDF2        | 613.4739777 | -1.311496692 | 0.425937411 | -3.0790831 | 0.002076 | 0.044443 |
| ZFR2          | 30.75157754 | 2.239980648  | 0.72776548  | 3.07788801 | 0.002085 | 0.044574 |
| TNFRSF25      | 72.80745646 | -1.402662287 | 0.455833632 | -3.0771365 | 0.00209  | 0.044638 |
| LTB           | 66.4150572  | 1.317363754  | 0.428375918 | 3.07525166 | 0.002103 | 0.044872 |
| PLAC8         | 1296.456855 | -1.03385581  | 0.336335095 | -3.0738862 | 0.002113 | 0.04503  |
| ATP1B3-AS1    | 71.53640746 | 1.712225765  | 0.557419457 | 3.07170075 | 0.002128 | 0.045312 |
| NANOGP4       | 70.53895419 | 2.052926633  | 0.670057989 | 3.06380443 | 0.002185 | 0.046475 |
| AC093609.1    | 7.51031913  | -4.058882661 | 1.325298597 | -3.0626175 | 0.002194 | 0.046609 |
| CARMIL1       | 16.71258645 | 3.029983789  | 0.989630973 | 3.06173096 | 0.002201 | 0.046689 |
| FAM20B        | 432.8781269 | 0.95680595   | 0.312532098 | 3.06146459 | 0.002203 | 0.046689 |
| HEY1          | 5.69864969  | -4.742500226 | 1.549284063 | -3.0610915 | 0.002205 | 0.046697 |
| NPM2          | 4.983667159 | 5.064897606  | 1.656285432 | 3.05798597 | 0.002228 | 0.047083 |
| GPR65         | 872.8409152 | -1.257048003 | 0.411045896 | -3.0581695 | 0.002227 | 0.047083 |
| AP001625.6    | 19.39014775 | 2.718629871  | 0.889283002 | 3.05710315 | 0.002235 | 0.047171 |
| ZNF571        | 321.3222286 | 1.051819661  | 0.344095694 | 3.05676496 | 0.002237 | 0.047174 |
| SLC7A1        | 73.98137676 | -1.387171202 | 0.453989063 | -3.0555168 | 0.002247 | 0.04732  |
| RP11-452L6.1  | 14.2097723  | 2.337378449  | 0.765452426 | 3.05359075 | 0.002261 | 0.047574 |
| UBAP1         | 331.5125991 | 0.921529008  | 0.301962477 | 3.05179974 | 0.002275 | 0.047739 |
| AC108448.2    | 7.855711046 | -3.833408092 | 1.256197402 | -3.0515969 | 0.002276 | 0.047739 |
| FRMD3         | 30.86060596 | -1.757381724 | 0.575788235 | -3.052132  | 0.002272 | 0.047739 |
| CTD-2647E9.3  | 61.41096225 | 1.525211302  | 0.500392897 | 3.04802748 | 0.002303 | 0.048258 |
| MEGF11        | 20.46406355 | -2.590686577 | 0.850223205 | -3.0470664 | 0.002311 | 0.048345 |
| UROS          | 239.4280947 | 0.917315121  | 0.301069511 | 3.04685492 | 0.002312 | 0.048345 |
| EMBP1         | 50.44107194 | 1.453678059  | 0.477751854 | 3.04274708 | 0.002344 | 0.048958 |
| RP11-142O6.1  | 14.55477455 | 2.383088876  | 0.783868591 | 3.04016375 | 0.002364 | 0.049327 |
| RN7SKP203     | 13.58008519 | 2.404689244  | 0.791142415 | 3.03951501 | 0.00237  | 0.049382 |
| AC144831.1    | 86.75695521 | -1.67418236  | 0.551137377 | -3.0376861 | 0.002384 | 0.04963  |
| NFKBID        | 273.1403373 | 0.862385145  | 0.444210329 | 1.94138922 | 0.052211 | 0.433943 |
| P4HA2         | 18.12806004 | 1.573295205  | 0.810681712 | 1.94070642 | 0.052294 | 0.434266 |
| TRAJ49        | 4.626969143 | 2.666037338  | 1.373674755 | 1.94080682 | 0.052282 | 0.434266 |
| ACVR1B        | 53.50993702 | 0.82656901   | 0.426022762 | 1.94019917 | 0.052355 | 0.434412 |
| ZFP37         | 19.31446283 | -1.422736644 | 0.733239174 | -1.9403446 | 0.052338 | 0.434412 |
| TAS2R50       | 11.86368357 | -1.694160342 | 0.873421326 | -1.9396828 | 0.052418 | 0.43475  |
| PRR29         | 54.38531259 | -0.851275512 | 0.439143862 | -1.9384889 | 0.052564 | 0.435505 |
| HYDIN         | 3.453942895 | -3.817808313 | 1.969491551 | -1.9384741 | 0.052565 | 0.435505 |

|               |             |              |             |            |          |          |
|---------------|-------------|--------------|-------------|------------|----------|----------|
| PFAS          | 145.0420999 | 0.670323025  | 0.345813978 | 1.93839193 | 0.052575 | 0.435505 |
| PIIF          | 221.887451  | 0.773899645  | 0.399430071 | 1.93750972 | 0.052683 | 0.436214 |
| RN7SL328P     | 21.44405306 | -1.392885419 | 0.719406897 | -1.936158  | 0.052848 | 0.437277 |
| CTB-55O6.13   | 34.37273922 | 1.124975994  | 0.581053249 | 1.93609793 | 0.052856 | 0.437277 |
| OCEL1         | 42.51419531 | -1.086555446 | 0.561330077 | -1.9356801 | 0.052907 | 0.437306 |
| RP11-374F3.5  | 29.88803182 | 1.302278741  | 0.672763988 | 1.93571411 | 0.052903 | 0.437306 |
| CAMK4         | 22.41359402 | -1.310236173 | 0.676940071 | -1.9355276 | 0.052926 | 0.437306 |
| SYTL1         | 963.7846097 | -0.604050337 | 0.312145006 | -1.9351594 | 0.052971 | 0.437419 |
| ARHGEF37      | 9.676126326 | 1.723976476  | 0.89091874  | 1.93505468 | 0.052984 | 0.437419 |
| RP13-870H17.3 | 3.548010395 | 3.888139955  | 2.011593739 | 1.93286541 | 0.053253 | 0.439458 |
| DONSON        | 59.23926884 | -0.830094037 | 0.429651193 | -1.9320185 | 0.053357 | 0.440136 |
| CTD-2538C1.2  | 7.623260516 | 1.977081124  | 1.023534732 | 1.93162094 | 0.053406 | 0.440357 |
| TRIM39        | 182.5271884 | 0.739139035  | 0.382933731 | 1.93020091 | 0.053582 | 0.441621 |
| HOXB3         | 61.9240084  | -1.221785915 | 0.633156641 | -1.929674  | 0.053647 | 0.441727 |
| MTCO2P1       | 4.078188604 | -3.147546534 | 1.631007151 | -1.9298177 | 0.053629 | 0.441727 |
| DUSP22        | 369.192734  | -0.71360957  | 0.369830956 | -1.9295561 | 0.053662 | 0.441727 |
| ZNF233        | 39.1955695  | 0.97202908   | 0.503924363 | 1.92891861 | 0.053741 | 0.441825 |
| ITGA2B        | 17.28484965 | -1.433999691 | 0.743382441 | -1.9290201 | 0.053728 | 0.441825 |
| PGBD2         | 73.74587287 | -0.805450272 | 0.417500169 | -1.9292214 | 0.053703 | 0.441825 |
| ZNF831        | 1446.229725 | -0.555181255 | 0.287900447 | -1.9283793 | 0.053808 | 0.442008 |
| TESC          | 85.83687025 | 0.835469022  | 0.433234997 | 1.92844306 | 0.0538   | 0.442008 |
| DHRS7         | 369.7358985 | -0.631687282 | 0.327614732 | -1.9281406 | 0.053838 | 0.442068 |
| ATOX1         | 147.4383101 | -0.66930123  | 0.347272541 | -1.9273082 | 0.053941 | 0.442735 |
| DPP9          | 652.7026466 | 0.590107933  | 0.306214631 | 1.92710561 | 0.053966 | 0.442758 |
| PLP2          | 49.61765566 | 1.061312218  | 0.550948166 | 1.92633769 | 0.054062 | 0.44336  |
| LINC00649     | 63.85216025 | -1.060408799 | 0.550778737 | -1.92529   | 0.054193 | 0.444248 |
| URGCP         | 204.7058378 | 0.670738676  | 0.348419266 | 1.92509066 | 0.054218 | 0.444268 |
| GABPB2        | 294.1844014 | -0.586557862 | 0.304857149 | -1.9240417 | 0.054349 | 0.444427 |
| TAB1          | 192.2291424 | 0.634198466  | 0.329579475 | 1.92426566 | 0.054321 | 0.444427 |
| ZNF132        | 49.62275308 | 0.887028675  | 0.46087564  | 1.92465949 | 0.054272 | 0.444427 |
| RPIA          | 87.74437446 | 0.751223068  | 0.39044091  | 1.9240378  | 0.05435  | 0.444427 |
| TECTA         | 9.348396048 | -1.861007395 | 0.967050727 | -1.9244155 | 0.054303 | 0.444427 |
| ARL5B         | 533.2881163 | 0.659256127  | 0.342788148 | 1.92321739 | 0.054453 | 0.445084 |
| FGFR1OP2      | 788.4098029 | 0.610001305  | 0.317240677 | 1.92283446 | 0.054501 | 0.445109 |
| AGMAT         | 6.687693193 | 2.066722238  | 1.07477224  | 1.92293973 | 0.054488 | 0.445109 |
| PRPF19        | 182.8866249 | 0.676642526  | 0.351975026 | 1.9224163  | 0.054553 | 0.445354 |
| CAMSAP1       | 401.7006829 | 0.588308834  | 0.306167466 | 1.92152629 | 0.054665 | 0.446084 |
| RPL41         | 315.4351713 | 0.639408984  | 0.332920098 | 1.92060794 | 0.054781 | 0.446844 |
| C1QC          | 9.42604925  | 2.492265441  | 1.297837264 | 1.92032199 | 0.054817 | 0.446954 |
| RP11-59C5.3   | 137.8217492 | -0.699413322 | 0.36437356  | -1.9194953 | 0.054922 | 0.447385 |
| HIST1H2BE     | 77.37019216 | -0.743840576 | 0.387631833 | -1.9189357 | 0.054992 | 0.447385 |
| ADM2          | 4.743368615 | -2.71919215  | 1.417110284 | -1.9188289 | 0.055006 | 0.447385 |
| LUCAT1        | 21.28557051 | -1.436127901 | 0.748183428 | -1.9194864 | 0.054923 | 0.447385 |
| SNORD12B      | 51.91001118 | 0.952053783  | 0.49602575  | 1.91936363 | 0.054938 | 0.447385 |
| RP11-354B3.1  | 66.97453956 | 0.903313335  | 0.470680189 | 1.91916583 | 0.054963 | 0.447385 |
| RP11-269F20.1 | 17.21995173 | -1.380783953 | 0.719731083 | -1.918472  | 0.055051 | 0.447568 |
| MUM1          | 240.7787985 | 0.667415763  | 0.348037599 | 1.9176542  | 0.055155 | 0.447858 |
| ZNF496        | 298.1036438 | 0.571527757  | 0.298012017 | 1.91780104 | 0.055136 | 0.447858 |

|               |             |              |             |            |          |          |
|---------------|-------------|--------------|-------------|------------|----------|----------|
| SCML1         | 29.54978599 | 1.080374329  | 0.563363628 | 1.91772112 | 0.055146 | 0.447858 |
| C9orf147      | 5.879590635 | -2.362803117 | 1.232498652 | -1.9170837 | 0.055227 | 0.448262 |
| ZC3H7A        | 394.3016994 | 0.566946007  | 0.295829878 | 1.91645959 | 0.055307 | 0.448722 |
| KRT86         | 55.62069842 | 1.241449579  | 0.6479316   | 1.9160195  | 0.055363 | 0.448992 |
| CYLD          | 2414.957684 | 0.50762085   | 0.264960994 | 1.91583237 | 0.055386 | 0.449001 |
| AMZ2          | 578.1858276 | 0.531323412  | 0.277379059 | 1.91551379 | 0.055427 | 0.449145 |
| NFIA          | 37.99974145 | -1.001555314 | 0.523107411 | -1.9146265 | 0.05554  | 0.449753 |
| KIAA1524      | 68.7865632  | 0.880663802  | 0.45998035  | 1.91456831 | 0.055548 | 0.449753 |
| RP11-852E15.1 | 19.00161043 | 1.28208268   | 0.669803033 | 1.91411895 | 0.055605 | 0.450033 |
| PRTFDC1       | 9.462076756 | 1.699478203  | 0.888227699 | 1.91333619 | 0.055705 | 0.450474 |
| NCOR2         | 386.726052  | -0.736563981 | 0.384934889 | -1.9134768 | 0.055687 | 0.450474 |
| KIAA1324      | 12.88576917 | -1.59618656  | 0.834525228 | -1.9126882 | 0.055788 | 0.450776 |
| CCNJL         | 282.5113472 | 0.86458807   | 0.452022362 | 1.91271084 | 0.055785 | 0.450776 |
| RP11-466A19.1 | 4.190852553 | 3.035993777  | 1.587560416 | 1.91236425 | 0.055829 | 0.450781 |
| DENND4B       | 835.6359998 | -0.597371791 | 0.312379486 | -1.9123272 | 0.055834 | 0.450781 |
| AMPH          | 16.81129976 | -1.391444574 | 0.72769127  | -1.9121359 | 0.055859 | 0.450795 |
| ZIK1          | 126.0853792 | 0.799434172  | 0.418172222 | 1.91173428 | 0.05591  | 0.451026 |
| EIF5          | 3932.628359 | 0.586242308  | 0.306842513 | 1.91056416 | 0.056061 | 0.451827 |
| HMGB1P8       | 51.80511501 | 1.058904693  | 0.554316274 | 1.91028974 | 0.056096 | 0.451827 |
| IL17RE        | 3.665334064 | -3.184058683 | 1.666827733 | -1.9102506 | 0.056101 | 0.451827 |
| FAM214B       | 119.7520743 | -0.729035106 | 0.381609778 | -1.9104204 | 0.056079 | 0.451827 |
| ZNF334        | 13.19318616 | 1.673048521  | 0.875992637 | 1.90988879 | 0.056148 | 0.452017 |
| DAPK1         | 66.03810005 | -2.587510321 | 1.354957629 | -1.9096614 | 0.056177 | 0.452069 |
| CCSER1        | 6.242568636 | -2.507191607 | 1.313209884 | -1.9092086 | 0.056235 | 0.452174 |
| GNB1L         | 56.43840431 | -0.974185553 | 0.510257061 | -1.9092054 | 0.056236 | 0.452174 |
| SORBS1        | 16.52680402 | -1.399012009 | 0.733032371 | -1.9085269 | 0.056323 | 0.452399 |
| MTCO1P11      | 15.20089241 | -1.793023024 | 0.939515173 | -1.9084556 | 0.056332 | 0.452399 |
| SAMD9         | 1600.030052 | -0.606933007 | 0.318011057 | -1.908528  | 0.056323 | 0.452399 |
| ZNF112        | 18.38278208 | 1.499253482  | 0.78582052  | 1.90788283 | 0.056406 | 0.452809 |
| RIC8A         | 890.3032165 | 0.591882769  | 0.310338781 | 1.90721497 | 0.056493 | 0.453319 |
| AP001469.5    | 18.16116118 | -1.387615646 | 0.727705965 | -1.9068356 | 0.056542 | 0.453529 |
| SLCO2B1       | 3.339333401 | 3.414530586  | 1.791666818 | 1.90578435 | 0.056678 | 0.454438 |
| TGFBR1        | 1188.394329 | -0.699559786 | 0.36716045  | -1.9053245 | 0.056738 | 0.454732 |
| OPA3          | 150.7035702 | 0.629282832  | 0.330517426 | 1.90393239 | 0.056919 | 0.455998 |
| RP11-322D14.1 | 7.78322969  | -2.02877446  | 1.065712328 | -1.9036793 | 0.056952 | 0.456077 |
| NCAPH         | 15.69376622 | -1.361956319 | 0.71565762  | -1.9030837 | 0.05703  | 0.456514 |
| FAM179A       | 486.0533995 | 0.615420811  | 0.32341538  | 1.90288047 | 0.057056 | 0.456542 |
| RP11-484L8.1  | 13.89266982 | -1.591942743 | 0.83736778  | -1.9011273 | 0.057285 | 0.457814 |
| RN7SL577P     | 14.1352038  | 1.563157618  | 0.822301183 | 1.90095509 | 0.057308 | 0.457814 |
| TDGF1P6       | 42.0372725  | 1.265408815  | 0.66556104  | 1.90126636 | 0.057267 | 0.457814 |
| RP11-693N9.2  | 133.2412741 | 0.817479355  | 0.429926045 | 1.9014418  | 0.057244 | 0.457814 |
| AMY2B         | 74.38986116 | -0.871147879 | 0.458343326 | -1.9006448 | 0.057349 | 0.457954 |
| EEF1AKMT1     | 18.18896923 | 1.277392769  | 0.672214531 | 1.90027545 | 0.057397 | 0.458155 |
| COL4A3        | 14.89634123 | 1.422227149  | 0.748788854 | 1.89937008 | 0.057516 | 0.458919 |
| PCM1          | 2814.429104 | 0.525463695  | 0.276982047 | 1.8971038  | 0.057814 | 0.461113 |
| IQCC          | 51.24357102 | 0.868890256  | 0.458110852 | 1.89668123 | 0.05787  | 0.461186 |
| MAP4K1        | 257.1215463 | 0.639877754  | 0.337344655 | 1.89680715 | 0.057853 | 0.461186 |
| ACOT4         | 21.28223311 | -1.326035745 | 0.699309163 | -1.8962082 | 0.057933 | 0.461312 |

|               |             |              |             |            |          |          |
|---------------|-------------|--------------|-------------|------------|----------|----------|
| RP11-429G19.3 | 29.72978215 | 1.107103006  | 0.583836235 | 1.89625607 | 0.057926 | 0.461312 |
| AP000708.1    | 13.62775412 | 1.497630109  | 0.789884553 | 1.89601139 | 0.057959 | 0.461333 |
| AC093495.4    | 71.55381408 | -0.775457415 | 0.409177165 | -1.895163  | 0.058071 | 0.461835 |
| RP11-620J15.3 | 60.91918444 | 0.996622224  | 0.525906879 | 1.89505455 | 0.058085 | 0.461835 |
| IPCEF1        | 1113.410558 | 0.798747761  | 0.421501599 | 1.89500529 | 0.058092 | 0.461835 |
| PEX11G        | 10.29281885 | -1.704234761 | 0.899952684 | -1.8936937 | 0.058266 | 0.463032 |
| GALNT10       | 981.3596227 | -0.498243692 | 0.263248774 | -1.8926724 | 0.058401 | 0.463924 |
| CTD-2651B20.7 | 131.3841882 | 1.930612773  | 1.020243927 | 1.89230509 | 0.05845  | 0.463939 |
| REPIN1        | 359.1527498 | 0.601792742  | 0.31799396  | 1.89246595 | 0.058429 | 0.463939 |
| SLC28A3       | 3.341834838 | -3.654788019 | 1.932243762 | -1.8914736 | 0.058561 | 0.464632 |
| ICA1L         | 67.12649567 | -0.925156363 | 0.489260029 | -1.8909298 | 0.058634 | 0.465021 |
| SCYL1         | 256.0349424 | 0.587066599  | 0.310693985 | 1.8895332  | 0.05882  | 0.465404 |
| TBXA2R        | 3.990299153 | -3.338048494 | 1.766619921 | -1.8895114 | 0.058823 | 0.465404 |
| BCAT2         | 36.88032229 | 0.968562558  | 0.512589829 | 1.88954697 | 0.058819 | 0.465404 |
| ADCY10P1      | 54.94300157 | -0.905833062 | 0.479182343 | -1.8903724 | 0.058708 | 0.465404 |
| ZFP1          | 68.55164536 | -0.85994602  | 0.45497006  | -1.8901156 | 0.058742 | 0.465404 |
| RP11-524O1.4  | 5.299049904 | -2.479994998 | 1.312324702 | -1.8897724 | 0.058788 | 0.465404 |
| NTHL1         | 20.29840011 | -1.217047862 | 0.644344765 | -1.8888147 | 0.058917 | 0.465956 |
| RP11-16E23.3  | 87.62793651 | 1.17315012   | 0.621283375 | 1.88826897 | 0.05899  | 0.466161 |
| RP11-431M7.3  | 10.3977706  | -1.777629877 | 0.941373342 | -1.8883367 | 0.058981 | 0.466161 |
| MAP1A         | 17.95652382 | -1.35535685  | 0.718063379 | -1.887517  | 0.059091 | 0.466586 |
| FERMT2        | 22.04595108 | 1.360497502  | 0.720752183 | 1.88760788 | 0.059079 | 0.466586 |
| CYB561D1      | 165.6585322 | -0.680535077 | 0.360764943 | -1.886367  | 0.059246 | 0.467061 |
| TACC3         | 153.3127354 | 0.720130446  | 0.381707262 | 1.886604   | 0.059214 | 0.467061 |
| RNF145        | 424.8527895 | 0.644872375  | 0.341817648 | 1.88659766 | 0.059214 | 0.467061 |
| OFD1          | 1057.372238 | 0.551469138  | 0.29231758  | 1.88654113 | 0.059222 | 0.467061 |
| PRDX1         | 58.15303863 | -0.862132922 | 0.45711405  | -1.8860346 | 0.05929  | 0.467227 |
| SH3BP4        | 5.819837842 | -2.365076149 | 1.254472935 | -1.8853146 | 0.059387 | 0.467619 |
| WNT3          | 32.13018603 | 1.232866546  | 0.653879765 | 1.88546368 | 0.059367 | 0.467619 |
| HNRNPC        | 2375.534699 | 0.519308149  | 0.275589636 | 1.88435297 | 0.059517 | 0.468455 |
| RP11-51J9.5   | 90.51210777 | 0.802502806  | 0.426090673 | 1.88340853 | 0.059645 | 0.469274 |
| FAM124B       | 26.01215872 | -1.337666048 | 0.710503691 | -1.8827011 | 0.059741 | 0.469841 |
| ADGRF3        | 28.73679937 | -1.097973334 | 0.583387446 | -1.8820654 | 0.059827 | 0.470332 |
| ZNF256        | 175.0038013 | 0.824708197  | 0.438271728 | 1.88172803 | 0.059873 | 0.470505 |
| CTD-2410N18.4 | 19.75745489 | 1.22841833   | 0.653285228 | 1.88037059 | 0.060058 | 0.471768 |
| CHD4          | 2151.680599 | 0.507727317  | 0.270150951 | 1.8794208  | 0.060187 | 0.472021 |
| RNU5E-4P      | 21.80999052 | 1.610682448  | 0.857509228 | 1.87832666 | 0.060336 | 0.472021 |
| JPH3          | 25.41384185 | -1.269924863 | 0.675837663 | -1.8790383 | 0.060239 | 0.472021 |
| TATDN1P1      | 28.4642852  | 1.238244185  | 0.659268409 | 1.87820949 | 0.060353 | 0.472021 |
| RP11-505P4.6  | 3.683919816 | 3.097999082  | 1.648585481 | 1.8791862  | 0.060219 | 0.472021 |
| RP11-478C1.8  | 6.000153593 | -2.245727617 | 1.19553338  | -1.8784315 | 0.060322 | 0.472021 |
| SS18L1        | 96.61166084 | -0.717654875 | 0.382061163 | -1.8783769 | 0.06033  | 0.472021 |
| SH3PXD2A      | 187.46849   | 0.698229719  | 0.37174882  | 1.87822982 | 0.06035  | 0.472021 |
| RNU6ATAC      | 23.15955735 | 1.385199205  | 0.737151972 | 1.87912297 | 0.060228 | 0.472021 |
| RP11-79M19.2  | 26.75352549 | -1.376523463 | 0.732772787 | -1.8785133 | 0.060311 | 0.472021 |
| RN7SKP266     | 3.670510361 | 2.862205482  | 1.523691098 | 1.87846834 | 0.060317 | 0.472021 |
| DECR1         | 255.8672175 | -0.669304695 | 0.356428873 | -1.8778072 | 0.060408 | 0.472264 |
| ITGAV         | 256.7548292 | -0.662541976 | 0.352914046 | -1.8773466 | 0.060471 | 0.472398 |

|               |             |              |             |            |          |          |
|---------------|-------------|--------------|-------------|------------|----------|----------|
| RP11-531A24.5 | 34.49513545 | -1.211225242 | 0.645187507 | -1.8773228 | 0.060474 | 0.472398 |
| EHBP1L1       | 822.2575848 | 0.555545704  | 0.29595034  | 1.87715853 | 0.060496 | 0.472398 |
| DPEP2         | 162.1439054 | -0.790708723 | 0.421408898 | -1.8763456 | 0.060608 | 0.473081 |
| CYB561A3      | 124.3583186 | -0.648781141 | 0.345867625 | -1.8758077 | 0.060682 | 0.473097 |
| ANKRD28       | 1274.700928 | 0.509393398  | 0.271529639 | 1.87601398 | 0.060653 | 0.473097 |
| ORAI1         | 269.5273765 | -0.926789185 | 0.494055796 | -1.8758796 | 0.060672 | 0.473097 |
| LINC01278     | 95.29462978 | -0.861680233 | 0.459460433 | -1.8754177 | 0.060735 | 0.473328 |
| ASPM          | 30.5271422  | -1.236985584 | 0.659659673 | -1.8751875 | 0.060767 | 0.473388 |
| TRGV5         | 32.36612656 | -1.074562155 | 0.573099603 | -1.8750007 | 0.060793 | 0.473401 |
| H2AFJ         | 130.1662953 | 0.637629605  | 0.340222625 | 1.87415403 | 0.060909 | 0.473935 |
| TNFRSF14      | 708.4929142 | -0.684827117 | 0.36538798  | -1.8742464 | 0.060896 | 0.473935 |
| ATP11A-AS1    | 7.632097275 | -2.162513497 | 1.153997256 | -1.873933  | 0.06094  | 0.473986 |
| STAB1         | 68.20762191 | 0.982351084  | 0.524547608 | 1.87275868 | 0.061102 | 0.474892 |
| ATP5HP4       | 125.0157257 | -0.769955431 | 0.411204992 | -1.872437  | 0.061146 | 0.474892 |
| PGM2L1        | 81.85160889 | -0.728148887 | 0.389031256 | -1.8716976 | 0.061248 | 0.474892 |
| FDPSP3        | 76.88641007 | 0.820054365  | 0.438087342 | 1.87189696 | 0.061221 | 0.474892 |
| RGP1          | 227.3316621 | 0.615683618  | 0.328920991 | 1.87182829 | 0.06123  | 0.474892 |
| CACNB1        | 98.70030245 | 0.683599605  | 0.36518053  | 1.87194976 | 0.061214 | 0.474892 |
| RP11-567P19.1 | 13.29784178 | -1.627816442 | 0.86949451  | -1.8721411 | 0.061187 | 0.474892 |
| RNASEH2B      | 304.3966134 | -0.6036685   | 0.322411704 | -1.8723529 | 0.061158 | 0.474892 |
| TIMP1         | 34.42551043 | -1.402287888 | 0.749289377 | -1.8714904 | 0.061277 | 0.474928 |
| TRAF2         | 181.9688981 | 0.704409239  | 0.376707064 | 1.86991248 | 0.061496 | 0.476071 |
| USP20         | 619.3825661 | 0.651319274  | 0.348316652 | 1.86990565 | 0.061497 | 0.476071 |
| ST7-OT4       | 18.56209682 | -1.504673305 | 0.804614358 | -1.8700553 | 0.061476 | 0.476071 |
| ATXN10        | 348.5202799 | 0.561392907  | 0.300311554 | 1.86936833 | 0.061572 | 0.476462 |
| RP11-410N8.3  | 15.71127087 | -1.59094379  | 0.851178016 | -1.8691082 | 0.061608 | 0.476556 |
| MAPRE2        | 1370.539856 | -0.519325214 | 0.277953025 | -1.868392  | 0.061707 | 0.477087 |
| UBXN2A        | 168.0612601 | 0.638099904  | 0.341546253 | 1.86826791 | 0.061725 | 0.477087 |
| CTB-39G8.3    | 19.8636892  | -1.216218921 | 0.651394457 | -1.8671005 | 0.061888 | 0.478158 |
| MRPL57P8      | 6.817928637 | -2.196744942 | 1.176748087 | -1.8667929 | 0.061931 | 0.478303 |
| SYK           | 1389.857232 | 0.551030081  | 0.295242297 | 1.86636565 | 0.06199  | 0.478577 |
| CASP3         | 528.5585715 | 0.575327116  | 0.30840373  | 1.86549986 | 0.062111 | 0.478764 |
| WDR13         | 187.5373027 | -0.654327674 | 0.350684746 | -1.8658572 | 0.062061 | 0.478764 |
| MIR23A        | 49.82198227 | 1.076221851  | 0.576855851 | 1.8656686  | 0.062088 | 0.478764 |
| ICOS          | 7.197018146 | -2.186364355 | 1.171827205 | -1.8657737 | 0.062073 | 0.478764 |
| RAB3IP        | 77.5676679  | 0.800903552  | 0.429476377 | 1.86483726 | 0.062204 | 0.479293 |
| Sep-08        | 25.4464822  | -1.178981842 | 0.632409279 | -1.8642703 | 0.062284 | 0.479713 |
| ESD           | 89.50184971 | 0.801750502  | 0.430100005 | 1.86410252 | 0.062307 | 0.479713 |
| TMSB10        | 2095.195347 | -0.62174917  | 0.333702826 | -1.8631822 | 0.062437 | 0.480521 |
| ARHGAP18      | 345.479762  | 0.678025375  | 0.364007664 | 1.86266786 | 0.062509 | 0.480891 |
| ICAM2         | 191.3989294 | -0.618661063 | 0.33216887  | -1.8624896 | 0.062534 | 0.480897 |
| DST           | 325.3436659 | 0.593188238  | 0.318589372 | 1.86192099 | 0.062614 | 0.481138 |
| AC010150.1    | 4.251390531 | -2.86257991  | 1.53734211  | -1.8620318 | 0.062599 | 0.481138 |
| GTF2IP13      | 12.0359335  | -1.55273309  | 0.834085695 | -1.861599  | 0.06266  | 0.4813   |
| PPP1R15A      | 5214.005352 | 0.624058542  | 0.335331824 | 1.86101795 | 0.062742 | 0.481556 |
| SEC14L2       | 106.7394833 | 0.802616081  | 0.431255981 | 1.86111293 | 0.062728 | 0.481556 |
| LY75          | 215.1384347 | -0.6832609   | 0.367194426 | -1.8607605 | 0.062778 | 0.481647 |
| FKBP5         | 1149.004031 | -1.597499364 | 0.858776915 | -1.860203  | 0.062857 | 0.482065 |



|               |             |              |             |            |          |          |
|---------------|-------------|--------------|-------------|------------|----------|----------|
| CTHRC1        | 9.610325863 | -1.742450257 | 0.93684911  | -1.8599049 | 0.062899 | 0.482093 |
| PRR13P1       | 9.214503977 | 1.696923736  | 0.912406986 | 1.85983203 | 0.062909 | 0.482093 |
| AXL           | 37.3421755  | 0.942843935  | 0.507004119 | 1.85963762 | 0.062937 | 0.482117 |
| SFT2D2        | 1115.353316 | -0.482689314 | 0.259673492 | -1.8588317 | 0.063051 | 0.482804 |
| RP5-1031J8.1  | 3.46173959  | -3.130313185 | 1.684575329 | -1.858221  | 0.063138 | 0.482913 |
| SPATA1        | 11.65659933 | -1.627709909 | 0.875953448 | -1.8582151 | 0.063138 | 0.482913 |
| RP11-324I22.3 | 19.35840393 | -1.635499001 | 0.880063857 | -1.8583867 | 0.063114 | 0.482913 |
| PBXIP1        | 1459.520539 | 0.5968274    | 0.321339676 | 1.85731002 | 0.063267 | 0.483335 |
| RP11-582J16.4 | 68.63804346 | -0.769996563 | 0.414545467 | -1.8574478 | 0.063247 | 0.483335 |
| ECE1          | 163.9802728 | -0.65215177  | 0.35107025  | -1.8576105 | 0.063224 | 0.483335 |
| GCDH          | 198.3797173 | 0.804989229  | 0.433545114 | 1.85676001 | 0.063345 | 0.483746 |
| DHRS4L1       | 4.533792087 | -2.78552822  | 1.500958376 | -1.8558331 | 0.063477 | 0.484567 |
| DDX24         | 1819.790018 | 0.529724717  | 0.28546917  | 1.85562846 | 0.063507 | 0.484602 |
| RIMKLB        | 139.6516901 | 0.749999064  | 0.404288681 | 1.85510775 | 0.063581 | 0.484982 |
| SUCLG2-AS1    | 36.02021591 | 1.004827195  | 0.541929464 | 1.85416602 | 0.063715 | 0.485821 |
| TEPSIN        | 182.2640846 | -0.655655333 | 0.353765848 | -1.8533596 | 0.063831 | 0.486513 |
| RAB27A        | 672.3339772 | 0.556371119  | 0.300227973 | 1.85316216 | 0.063859 | 0.486541 |
| NUF2          | 14.2218232  | -1.489930661 | 0.804237275 | -1.8526009 | 0.06394  | 0.486638 |
| EFCC1         | 6.270391997 | 2.226309857  | 1.201749025 | 1.85255807 | 0.063946 | 0.486638 |
| DHODH         | 67.88765981 | 0.835622455  | 0.451029556 | 1.85269999 | 0.063925 | 0.486638 |
| HIST1H3G      | 24.90302316 | -1.274644009 | 0.688257425 | -1.8519873 | 0.064028 | 0.487074 |
| HSPA9         | 1625.041677 | 0.541163947  | 0.292352429 | 1.85106705 | 0.06416  | 0.487892 |
| GALM          | 101.1084547 | -0.72057011  | 0.389451029 | -1.8502201 | 0.064282 | 0.488068 |
| NPM1P26       | 40.63045654 | 1.069140884  | 0.57782457  | 1.8502863  | 0.064272 | 0.488068 |
| MIR4496       | 9.668842108 | -1.988496751 | 1.074585557 | -1.8504778 | 0.064245 | 0.488068 |
| TWF2          | 188.0404323 | -0.666433218 | 0.360136111 | -1.8505037 | 0.064241 | 0.488068 |
| CD3D          | 20.21489821 | -1.236627681 | 0.66848464  | -1.8498969 | 0.064328 | 0.488234 |
| SAMD3         | 1001.638499 | -0.556668988 | 0.300991084 | -1.8494534 | 0.064392 | 0.488531 |
| ZNF69         | 20.12909162 | -1.234385959 | 0.66757436  | -1.8490614 | 0.064449 | 0.488773 |
| RP11-358B23.5 | 18.70436541 | -1.29414238  | 0.700435228 | -1.8476261 | 0.064656 | 0.490158 |
| TTC30B        | 70.88492003 | 0.911034353  | 0.493138489 | 1.8474209  | 0.064686 | 0.490196 |
| RNU6-407P     | 6.400056754 | 2.391547734  | 1.29518238  | 1.84649496 | 0.06482  | 0.490672 |
| H6PD          | 764.4051109 | 0.487220964  | 0.263828126 | 1.84673625 | 0.064785 | 0.490672 |
| SYCP2         | 81.06938436 | -0.762887849 | 0.413159412 | -1.8464734 | 0.064824 | 0.490672 |
| STRIP2        | 13.61180436 | -1.854558931 | 1.004509081 | -1.8462341 | 0.064858 | 0.490746 |
| RP11-930O11.2 | 3.163430806 | -3.085312513 | 1.671506454 | -1.8458275 | 0.064917 | 0.490817 |
| SLC20A1       | 1811.624609 | -0.499688361 | 0.27069486  | -1.845947  | 0.0649   | 0.490817 |
| MMD           | 166.2444128 | 0.624115741  | 0.338180895 | 1.84550857 | 0.064964 | 0.49098  |
| EI24          | 148.7293592 | 0.648012228  | 0.351237746 | 1.84493903 | 0.065046 | 0.491418 |
| PIK3R6        | 17.09444094 | 1.493229959  | 0.809608383 | 1.84438549 | 0.065127 | 0.491838 |
| RP11-23J18.1  | 34.70088406 | -0.946536849 | 0.513299943 | -1.8440229 | 0.06518  | 0.492049 |
| RNY1P16       | 4.30007338  | 3.210941411  | 1.742858778 | 1.8423417  | 0.065425 | 0.492186 |
| RP11-774O3.3  | 14.20992442 | -1.472777245 | 0.799371093 | -1.8424199 | 0.065414 | 0.492186 |
| TRAM2         | 209.0170036 | -0.591736525 | 0.321087782 | -1.842912  | 0.065342 | 0.492186 |
| BTN3A2        | 1729.224757 | -0.535037147 | 0.290435145 | -1.8421915 | 0.065447 | 0.492186 |
| SEC24C        | 656.2097416 | 0.55357987   | 0.3003057   | 1.84338782 | 0.065272 | 0.492186 |
| AC094019.4    | 18.92098521 | 1.316042729  | 0.713979191 | 1.84325082 | 0.065292 | 0.492186 |
| RP11-521B24.4 | 23.5168699  | 1.258032443  | 0.682882153 | 1.84223945 | 0.06544  | 0.492186 |

|               |             |              |             |            |          |          |
|---------------|-------------|--------------|-------------|------------|----------|----------|
| RP11-236P24.3 | 4.674432523 | -2.544155818 | 1.38038597  | -1.8430757 | 0.065318 | 0.492186 |
| LRRC75B       | 23.44039408 | 1.152476095  | 0.625412842 | 1.84274453 | 0.065366 | 0.492186 |
| IFI30         | 8.908716041 | -1.755023493 | 0.952596831 | -1.8423571 | 0.065423 | 0.492186 |
| CDCA3         | 15.23044425 | -1.426690829 | 0.774804948 | -1.8413548 | 0.06557  | 0.492842 |
| ACACA         | 360.9075499 | 0.543303308  | 0.295072225 | 1.84125533 | 0.065584 | 0.492842 |
| IGFBP3        | 16.21532595 | -1.739147908 | 0.944656896 | -1.8410366 | 0.065616 | 0.492895 |
| SLC2A13       | 198.4758165 | 0.605389856  | 0.328864798 | 1.84084724 | 0.065644 | 0.492916 |
| DDX3X         | 6851.474944 | 0.572088097  | 0.310816183 | 1.84059945 | 0.06568  | 0.492996 |
| TRBV25-1      | 10.17542087 | 1.70001874   | 0.923705314 | 1.84043408 | 0.065705 | 0.492996 |
| TRBJ1-2       | 9.726494571 | 1.619245587  | 0.880040745 | 1.83996661 | 0.065773 | 0.493324 |
| PGM2          | 336.4868878 | 0.671319146  | 0.36497973  | 1.83933268 | 0.065866 | 0.493835 |
| CST7          | 2027.756161 | -0.554488977 | 0.301516506 | -1.8390004 | 0.065915 | 0.494013 |
| KCNJ1         | 19.94782358 | -1.223258547 | 0.665281511 | -1.8387082 | 0.065958 | 0.494148 |
| STX1A         | 66.06679641 | 0.914521601  | 0.497557647 | 1.83802139 | 0.066059 | 0.494441 |
| GGACT         | 37.41296899 | -0.980502827 | 0.533406012 | -1.8381923 | 0.066034 | 0.494441 |
| RNF32         | 16.89935643 | -1.447681478 | 0.787668299 | -1.8379329 | 0.066072 | 0.494441 |
| RP11-535C21.3 | 8.362917444 | -1.863600768 | 1.014207978 | -1.8374937 | 0.066137 | 0.494738 |
| AL109767.1    | 8.184456432 | -1.91400324  | 1.041860273 | -1.8371017 | 0.066195 | 0.494796 |
| TXLNB         | 22.30720342 | -1.224863128 | 0.666707068 | -1.8371834 | 0.066183 | 0.494796 |
| RP11-173M1.4  | 4.174879966 | -2.840265083 | 1.547034898 | -1.8359412 | 0.066366 | 0.49589  |
| SWT1          | 95.5571018  | -0.676556346 | 0.368742015 | -1.8347688 | 0.06654  | 0.496982 |
| SLCO4A1       | 15.51145057 | 1.310458881  | 0.714296413 | 1.83461495 | 0.066563 | 0.496982 |
| PFN2          | 17.94644525 | -1.389281956 | 0.757383606 | -1.8343174 | 0.066607 | 0.497123 |
| RP11-517I3.1  | 25.21649577 | 1.202857992  | 0.65588626  | 1.83394296 | 0.066662 | 0.497163 |
| EIF2AK2       | 553.0946383 | 0.566163968  | 0.30869784  | 1.8340393  | 0.066648 | 0.497163 |
| TRMT5         | 31.40614374 | -1.15703571  | 0.631051711 | -1.8335038 | 0.066728 | 0.497461 |
| AGAP3         | 221.6292908 | 0.657461551  | 0.358627699 | 1.83327042 | 0.066762 | 0.497479 |
| TOB1-AS1      | 14.42092787 | -1.714290078 | 0.935161515 | -1.8331487 | 0.06678  | 0.497479 |
| CACNB3        | 68.02538305 | 0.812040045  | 0.443080031 | 1.83271641 | 0.066845 | 0.49777  |
| ITPR3         | 1084.753715 | 0.606321888  | 0.330903285 | 1.83232357 | 0.066903 | 0.497831 |
| FANCA         | 128.2469693 | -0.915410046 | 0.499572837 | -1.8323855 | 0.066894 | 0.497831 |
| VAR5          | 200.0415941 | 0.645629516  | 0.352388814 | 1.83215099 | 0.066929 | 0.497834 |
| CPVL          | 70.63155206 | 0.761991606  | 0.415982618 | 1.83178713 | 0.066983 | 0.497863 |
| DNAJA1        | 1893.343451 | 0.558719035  | 0.304986501 | 1.83194677 | 0.066959 | 0.497863 |
| RP5-1142A6.9  | 23.46796222 | -1.164983913 | 0.636069398 | -1.8315359 | 0.067021 | 0.497954 |
| TBC1D22A      | 268.081559  | -0.5980256   | 0.326609582 | -1.8310106 | 0.067099 | 0.498337 |
| SALL2         | 10.89931819 | -1.787578633 | 0.976454389 | -1.8306832 | 0.067148 | 0.498337 |
| KLRF2         | 7.025150892 | 2.188250115  | 1.195217118 | 1.830839   | 0.067125 | 0.498337 |
| FBXO3         | 694.4399442 | -0.495616589 | 0.270856217 | -1.8298143 | 0.067278 | 0.499113 |
